# Supplementary material for: Doubly fused fluorene embedded heterosapphyrins
Source: Royal Society of Chemistry journal article supplement (doi:10.1039/d1qo00497b), 2021-01-01
Supplement: d1qo00497b1.pdf [file d1qo00497b1.pdf]

## Supporting Information

### Doubly Fused Fluorene Embedded Heterosapphyrins

Bharti Yadav, Prosenjit Isar and Mangalampalli Ravikanth\*

Department of Chemistry, Indian Institute of Technology Bombay, Powai, Mumbai 400076,  
India, E-mail: [ravikanth@chem.iitb.ac.in](mailto:ravikanth@chem.iitb.ac.in)

|                   | Experimental Section                                                                                                                         | S3-S9          |
|-------------------|----------------------------------------------------------------------------------------------------------------------------------------------|----------------|
| <b>Figure S1</b>  | HRMS spectrum of compound <b>1</b>                                                                                                           | <b>S10</b>     |
| <b>Figure S2</b>  | <sup>1</sup> H NMR of compound <b>1</b> recorded in CDCl <sub>3</sub>                                                                        | <b>S11</b>     |
| <b>Figure S3</b>  | <sup>13</sup> C NMR of compound <b>1</b> recorded in CDCl <sub>3</sub>                                                                       | <b>S12</b>     |
| <b>Figure S4</b>  | HRMS spectrum of compound <b>2</b>                                                                                                           | <b>S13</b>     |
| <b>Figure S5</b>  | <sup>1</sup> H NMR of compound <b>2</b> recorded in CDCl <sub>3</sub>                                                                        | <b>S14</b>     |
| <b>Figure S6</b>  | <sup>13</sup> C NMR of compound <b>2</b> recorded in CDCl <sub>3</sub>                                                                       | <b>S15</b>     |
| <b>Figure S7</b>  | HRMS spectrum of compound <b>3</b>                                                                                                           | <b>S16</b>     |
| <b>Figure S8</b>  | <sup>1</sup> H NMR of compound <b>3</b> recorded in CDCl <sub>3</sub>                                                                        | <b>S17</b>     |
| <b>Figure S9</b>  | <sup>13</sup> C NMR of compound <b>3</b> recorded in CDCl <sub>3</sub>                                                                       | <b>S18</b>     |
| <b>Figure S10</b> | HRMS spectrum of compound <b>4</b>                                                                                                           | <b>S19</b>     |
| <b>Figure S11</b> | <sup>1</sup> H NMR of compound <b>4</b> recorded in CDCl <sub>3</sub>                                                                        | <b>S20</b>     |
| <b>Figure S12</b> | <sup>13</sup> C NMR of compound <b>4</b> recorded in CDCl <sub>3</sub>                                                                       | <b>S21</b>     |
| <b>Figure S13</b> | HRMS spectrum of compound <b>5</b>                                                                                                           | <b>S22</b>     |
| <b>Figure S14</b> | <sup>1</sup> H NMR of compound <b>5</b> recorded in CDCl <sub>3</sub>                                                                        | <b>S23</b>     |
| <b>Figure S15</b> | <sup>13</sup> C NMR of compound <b>5</b> recorded in CDCl <sub>3</sub>                                                                       | <b>S24</b>     |
| <b>Figure S17</b> | HRMS spectrum of compound <b>11</b>                                                                                                          | <b>S25</b>     |
| <b>Figure S18</b> | <sup>1</sup> H NMR of compound <b>11</b> recorded in CDCl <sub>3</sub>                                                                       | <b>S26</b>     |
| <b>Figure S19</b> | <sup>13</sup> C NMR of compound <b>11</b> recorded in CDCl <sub>3</sub>                                                                      | <b>S27</b>     |
| <b>Figure S20</b> | HRMS spectrum of compound <b>12</b>                                                                                                          | <b>S28</b>     |
| <b>Figure S21</b> | <sup>1</sup> H NMR of compound <b>12</b> recorded in CDCl <sub>3</sub>                                                                       | <b>S29</b>     |
| <b>Figure S21</b> | <sup>13</sup> C NMR of compound <b>12</b> recorded in CDCl <sub>3</sub>                                                                      | <b>S30</b>     |
| <b>Figure S22</b> | HRMS spectrum of compound <b>13</b>                                                                                                          | <b>S31</b>     |
| <b>Figure S23</b> | <sup>1</sup> H NMR of compound <b>13</b> recorded in CDCl <sub>3</sub>                                                                       | <b>S32</b>     |
| <b>Figure S24</b> | <sup>13</sup> C NMR of compound <b>13</b> recorded in CDCl <sub>3</sub>                                                                      | <b>S33</b>     |
| <b>Figure S25</b> | <sup>1</sup> H- <sup>1</sup> H NOESY spectrum of compound <b>5</b> recorded in CDCl <sub>3</sub>                                             | <b>S34</b>     |
| <b>Figure S26</b> | <sup>1</sup> H- <sup>1</sup> H NOESY spectrum of compound <b>13</b> recorded in CDCl <sub>3</sub>                                            | <b>S35-S36</b> |
| <b>Figure S27</b> | <sup>1</sup> H- <sup>1</sup> H COSY spectrum of compound <b>13</b> recorded in CDCl <sub>3</sub>                                             | <b>S37</b>     |
| <b>Figure S28</b> | Comparison of absorption spectra of compounds <b>1-5</b> recorded in CHCl <sub>3</sub> .                                                     | <b>S38</b>     |
| <b>Figure S29</b> | Comparison of absorption spectra of compounds <b>11-13</b> recorded in CHCl <sub>3</sub> .                                                   | <b>S38</b>     |
| <b>Figure S30</b> | Cyclic voltammograms and Differential pulse voltammograms of compounds <b>1,2,4</b> and <b>5</b> recorded in CH <sub>2</sub> Cl <sub>2</sub> | <b>S39</b>     |

|                   |                                                                                     |                |
|-------------------|-------------------------------------------------------------------------------------|----------------|
| <b>Figure S31</b> | Calculation for the stability of compound 3 over compound 10.                       | <b>S40</b>     |
| <b>Figure S32</b> | Calculation for the stability of compound 3 over compound 13.                       | <b>S40</b>     |
| <b>Figure S33</b> | Cartesian coordinates of the S0 optimized structures of the compounds <b>10</b>     | <b>S41</b>     |
| <b>Figure S34</b> | Cartesian coordinates of the S0 optimized structures of the compounds <b>3</b>      | <b>S42</b>     |
| <b>Figure S35</b> | Cartesian coordinates of the S0 optimized structures of the compounds <i>type a</i> | <b>S43-S44</b> |
| <b>Figure S36</b> | Cartesian coordinates of the S0 optimized structures of the compounds <i>type b</i> | <b>S45-S46</b> |
|                   | References                                                                          | <b>S47-S48</b> |

## Experimental Section

**General Experiment:** The chemicals such as  $\text{BF}_3 \cdot \text{OEt}_2$  and 2,3-dichloro-5,6-dicyano-1,4-benzoquinone (DDQ) were used as obtained from Aldrich. All other chemicals used for the synthesis were reagent grade unless otherwise specified. Column chromatography was performed on silica (60–120 and 100–200 mesh), neutral alumina, and basic alumina.  $^1\text{H}$ ,  $^2\text{D}$ , and  $^{13}\text{C}\{^1\text{H}\}$  NMR spectra were recorded in  $\text{CDCl}_3$  on Bruker 400 and 500 MHz instruments. Tetramethylsilane [ $\text{Si}(\text{CH}_3)_4$ ] was used as an internal standard for  $^1\text{H}$  and  $^{13}\text{C}\{^1\text{H}\}$  NMR. Absorption spectra were obtained with a Cary Series UV–Vis–NIR and UV 3600 Shimadzu spectrophotometer. Cyclic voltammetric studies were carried out with a BAS electrochemical system utilizing the three-electrode configuration consisting of glassy carbon (working electrode), platinum wire (auxiliary electrode) and saturated calomel (reference electrode) electrodes. The experiments were done in dry  $\text{CH}_2\text{Cl}_2$  using 0.1 M tetrabutylammonium perchlorate (TBAP) as a supporting electrolyte. Half-wave potentials were measured using differential pulse voltammetry (DPV) and also calculated manually by taking the average of the cathodic and anodic peak potentials. All potentials were calibrated versus a saturated calomel electrode by the addition of ferrocene as an internal standard, taking  $E_{1/2}(\text{Fc}/\text{Fc}^+) = 0.42 \text{ V}$  versus SCE. All the solutions were purged prior to electrochemical and spectral measurements with argon gas. The high-resolution mass spectra (HRMS) were recorded with a Bruker maXis Impact and QT of micro mass spectrometer using positive mode ESI methods for acetonitrile/methanol solutions. For UV–vis spectroscopy, the stock solution of all compounds ( $5 \times 10^{-4} \text{ M}$ ) was prepared by using HPLC-grade chloroform solvent.

**Computational details:** Full geometry of compound **1-5** were optimization by using Gaussian 09 quantum chemical software.<sup>2</sup> For compound **1-5**, the density functional theory (DFT)<sup>3</sup> method with the B3LYP/6-31G(d,p)<sup>1</sup> basis set was used for all atoms for optimization in  $S_0$  state. The frequency calculations were done on  $S_0$  optimized geometries to substantiate genuine global minimum energy structures and found that the sum of imaginary frequencies was zero for all the metal complexes. The optimized geometries were used to gain frontier molecular orbitals (FMOs) and were also subjected to single point TD-DFT calculations for the first 50  $S_0 \rightarrow S_n$  transitions to understand absorption properties of macrocycle **3-5**.<sup>4-10</sup> The integral equation formalism for the polarizable continuum model (PCM) within the self-consistent reaction field (SCRF) theory was used in the TD-DFT calculations to describe the solvation of **3-5** in chloroform.

**General procedure for the synthesis of doubly fused fluorene embedded heterosapphyrins**

**1-5:** In a 250 mL one-necked round-bottom flask fitted with a nitrogen bubbler, samples of fluorene based tripyrrane **8** (0.24 mmol) and appropriate bithiophene diols **9a-e** (0.24 mmol) were dissolved in dichloromethane (150 ml) and  $N_2$  gas was purged for 10 min. The condensation was initiated by adding  $BF_3 \cdot OEt_2$  (0.12 mmol) and the reaction mixture was stirred for 45 minutes at room temperature under inert atmosphere. The oxidizing agent, DDQ (0.59 mmol) was then added and the reaction mixture was stirred for additional 1 h in open air at room temperature. The solvent was removed on rotary evaporator under reduced pressure and the crude mixture was subjected to basic alumina column chromatography. The more polar major spot of the desired macrocycle was collected using petroleum ether/dichloromethane (75:25) and the doubly fused fluorene embedded heterosapphyrins **1-5** were obtained as brown colored solids in 5-7% yields.

**Compound 1:** Compound **1** was synthesized from **8** (120 mg, 0.24 mmol) and **9a** (90 mg, 0.24 mmol) by following the general procedure described above. Yield 7% (15 mg);  $^1\text{H}$  NMR (500 MHz,  $\text{CDCl}_3$ )  $\delta$  (ppm): 7.86 (d,  $J = 7.8$  Hz, 2H), 7.59 (d,  $J = 7.5$  Hz, 4H), 7.55 (s, 2H), 7.48 (d,  $J = 7.8$  Hz, 2H), 7.39 (dd,  $J = 12.0, 5.5$  Hz, 8H), 7.23 (d,  $J = 8.1$  Hz, 6H), 6.99 (d,  $J = 5.8$  Hz, 2H), 6.61 (d,  $J = 5.9$  Hz, 2H), 4.11 (d,  $J = 21.7$  Hz, 1H), 3.88 – 3.71 (m, 3H), 2.42 (s, 6H).  $^{13}\text{C}$  NMR (126 MHz,  $\text{CDCl}_3$ )  $\delta$  146.94, 142.80, 142.66, 138.78, 138.68, 138.52, 138.12, 138.01, 137.86, 137.70, 137.57, 137.37, 135.44, 135.23, 134.38, 133.87, 132.94, 131.52, 131.41, 131.21, 129.81, 129.06, 128.92, 128.83, 128.27, 128.02, 127.64, 127.17, 126.68, 126.35, 126.19, 126.07, 125.42, 122.26, 122.21, 29.72, 21.33. UV-vis (in  $\text{CHCl}_3$ ,  $\lambda_{\text{max}}/\text{nm}$ ) 443, 566. HR ESI-MS (positive):  $m/z$  calcd for  $[\text{C}_{59}\text{H}_{38}\text{N}_2\text{S}_2]^+$  : 838.2476  $[\text{M}]^+$  ; found: 838.2475.

**Compound 2:** Compound **2** was synthesized from **8** (120 mg, 0.24 mmol) and **9b** (97 mg, 0.24 mmol) by following the general procedure described above. Yield 6% (14 mg);  $^1\text{H}$  NMR (500 MHz,  $\text{CDCl}_3$ )  $\delta$  (ppm): 7.85 (d,  $J = 7.8$  Hz, 2H), 7.54 (s, 2H), 7.49 (t,  $J = 9.9$  Hz, 6H), 7.38 (d,  $J = 8.0$  Hz, 4H), 7.22 (t,  $J = 7.1$  Hz, 8H), 6.97 (d,  $J = 5.9$  Hz, 2H), 6.59 (d,  $J = 5.9$  Hz, 2H), 4.11 (d,  $J = 21.7$  Hz, 1H), 3.86 – 3.71 (m, 3H), 2.42 (s, 6H), 2.37 (s, 6H).  $^{13}\text{C}$  NMR (126 MHz,  $\text{CDCl}_3$ )  $\delta$  146.90, 142.73, 138.57, 134.18, 131.51, 130.19, 129.62, 129.22, 129.04, 128.49, 128.29, 127.30, 126.39, 126.33, 126.11, 125.10, 122.25, 121.39, 110.17, 21.33, 21.25. UV-vis (in  $\text{CHCl}_3$ ,  $\lambda_{\text{max}}/\text{nm}$ ) 447, 564. HR ESI-MS (positive):  $m/z$  calcd for  $[\text{C}_{61}\text{H}_{42}\text{N}_2\text{S}_2]^+$  : 866.2789  $[\text{M}]^+$  ; found: 866.2786.

**Compound 3.** Compound **3** was synthesized from **8** (120 mg, 0.24 mmol) and **9c** (105 mg, 0.24 mmol) by following the general procedure described above. Yield 7% ( 14 mg ) ;  $^1\text{H}$  NMR (500

MHz, CDCl<sub>3</sub>)  $\delta$  (ppm): 7.85 (d, J = 7.8 Hz, 2H), 7.53 (d, J = 6.3 Hz, 6H), 7.47 (d, J = 7.6 Hz, 2H), 7.38 (d, J = 7.8 Hz, 4H), 7.23 (d, J = 7.8 Hz, 4H), 6.95 (d, J = 8.6 Hz, 6H), 6.58 (d, J = 5.5 Hz, 2H), 4.10 (d, J = 21.6 Hz, 1H), 3.86 – 3.71 (m, 9H), 2.39 (s, 6H). <sup>13</sup>C NMR (101 MHz, CDCl<sub>3</sub>)  $\delta$  158.07, 146.93, 142.73, 141.93, 138.59, 137.83, 137.81, 137.28, 135.17, 131.47, 131.20, 129.02, 128.27, 127.37, 126.89, 126.47, 126.22, 122.22, 122.14, 114.42, 110.42, 110.18, 55.35, 29.71, 21.30. UV-vis (in CHCl<sub>3</sub>,  $\lambda_{\max}$ /nm) 454, 565. HR ESI-MS (positive): m/z calcd for [C<sub>61</sub>H<sub>42</sub>N<sub>2</sub>O<sub>2</sub>S<sub>2</sub>]<sup>+</sup>: 898.2688 [M]<sup>+</sup>; found: 898.2679.

**Compound 4:** Compound **4** was synthesized from **8** (120 mg, 0.24 mmol) and **9d** (127 mg, 0.24 mmol) by following the general procedure described above. Yield 4% ( 10 mg ) ; <sup>1</sup>H NMR (500 MHz, CDCl<sub>3</sub>)  $\delta$  7.86 (d, J = 7.8 Hz, 2H), 7.55 (s, 2H), 7.50 (t, J = 8.5 Hz, 4H), 7.46 (t, J = 7.1 Hz, 6H), 7.38 (d, J = 8.0 Hz, 4H), 7.24 (d, J = 8.0 Hz, 4H), 6.94 (d, J = 5.9 Hz, 2H), 6.63 (d, J = 5.9 Hz, 2H), 4.12 (d, J = 21.7 Hz, 1H), 3.88 – 3.71 (m, 3H), 2.42 (s, 6H). <sup>13</sup>C NMR (126 MHz, CDCl<sub>3</sub>)  $\delta$  146.9, 144.9, 144.42, 143.0, 140.4, 138.8, 138.3, 138.1, 137.4, 137.1, 135.0, 131.7, 131.2, 130.8, 129.2, 128.4, 128.2, 125.7, 124.5, 122.3, 110.6, 108.3, 29.7. UV-vis (in CHCl<sub>3</sub>,  $\lambda_{\max}$ /nm) 444, 568. HR ESI-MS (positive): m/z calcd for [C<sub>59</sub>H<sub>36</sub>Br<sub>2</sub>N<sub>2</sub>S<sub>2</sub>]<sup>+</sup>: 996.0687 [M]<sup>+</sup>; found: 996.0664.

**Compound 5:** Compound **5** was synthesized from **8** (120 mg, 0.24 mmol) and **9e** (111 mg, 0.24 mmol) by following the general procedure described above. Yield 6% ( 13 mg ) . <sup>1</sup>H NMR (400 MHz, CDCl<sub>3</sub>)  $\delta$  (ppm): 8.23 (d, J = 8.8 Hz, 4H), 7.84 (t, J = 17.7 Hz, 2H), 7.66 (d, J = 8.8 Hz, 4H), 7.55 (s, 2H), 7.46 (d, J = 7.8 Hz, 2H), 7.40 (d, J = 8.0 Hz, 4H), 7.27 (d, J = 2.0 Hz, 4H), 7.02 (d, J = 5.9 Hz, 2H), 6.73 (d, J = 5.9 Hz, 2H), 4.14 (d, J = 21.5 Hz, 1H), 3.82 – 3.75 (m, 3H), 2.44 (s, 6H). <sup>13</sup>C NMR  $\delta$  (126 MHz, CDCl<sub>3</sub>) 146.9, 142.8, 142.75, 138.6, 138.4, 138.2, 137.5,

137.3, 135.0, 132.7, 131.9, 131.5, 131.1, 129.1, 128.3, 128.2, 127.54, 127.0, 122.2, 121.8, 119.4, 110.3, 109.3, 21.3. UV-vis (in CHCl<sub>3</sub>, λ<sub>max</sub>/nm) 472, 587. HR ESI-MS (positive): m/z calcd for [C<sub>59</sub>H<sub>36</sub>N<sub>4</sub>O<sub>4</sub>S<sub>2</sub>]<sup>+</sup> : 928.2178 [M]<sup>+</sup> ; found: 928.2172.

**General procedure for the synthesis of mono-fused fluorene embedded heterosapphyrins**

**11-13:** Samples of fluorene based tripyrrane **8** (0.24 mmol) and appropriate bithiophene diols **9a-c** (0.24 mmol) were dissolved in dichloromethane (150 ml) in a 250 mL one-necked round-bottom flask fitted with a nitrogen bubbler and purged nitrogen for 10 min.. BF<sub>3</sub>.OEt<sub>2</sub> (0.12 mmol) was added to initiate the reaction and stirred for 45 min at room temperature under inert atmosphere. One equivalent of the oxidizing agent, DDQ (0.24 mmol) was then added and the reaction mixture was stirred for additional 10 minutes in open air at room temperature. The solvent was removed on rotary evaporator under reduced pressure and the crude mixture was subjected to basic alumina column chromatography. The desired less polar major spot was collected using petroleum ether/dichloromethane (85:15) and afforded the pure pink colored solids of mono fused fluorene embedded heterosapphyrins **11-13** in 6-8% yields.

**Compound 11:** Compound **11** was synthesized from **8** (120 mg, 0.24 mmol) and **9a** (90 mg, 0.24 mmol) by following the general procedure described above. Yield 7% (14 mg); <sup>1</sup>H NMR (500 MHz, CDCl<sub>3</sub>) δ 7.91 (d, *J* = 7.9 Hz, 1H), 7.82 (d, *J* = 7.8 Hz, 1H), 7.78 (s, 1H), 7.64 (d, *J* = 7.5 Hz, 2H), 7.45 (t, *J* = 6.9 Hz, 3H), 7.38 – 7.29 (m, 7H), 7.28 – 7.18 (m, 8H), 7.04 (s, 1H), 6.98 (d, *J* = 5.8 Hz, 1H), 6.80 (s, 1H), 6.52 (d, *J* = 5.8 Hz, 1H), 6.38 (d, *J* = 3.6 Hz, 1H), 6.25 (d, *J* = 3.6 Hz, 1H), 5.99 (s, 1H), 5.80 (s, 1H), 5.63 (s, 1H), 5.46 (s, 1H), 4.50 (s, 1H), 3.75 (d, *J* = 22.1 Hz, 1H), 3.47 (d, *J* = 22.1 Hz, 1H), 2.45 (s, 3H), 2.39 (s, 3H). <sup>13</sup>C NMR (126 MHz, CDCl<sub>3</sub>) δ 144.72, 142.96, 141.83, 141.48, 139.83, 139.56, 138.37, 138.09, 137.16, 136.63, 133.91, 131.72, 128.25, 128.03, 126.67, 126.02, 124.13, 122.79, 121.95, 120.42, 119.89, 111.77, 107.31, 106.46,

49.66, 45.19, 37.34, 29.48, 21.35, 21.08. UV-vis (in CHCl<sub>3</sub>, λ<sub>max</sub>/nm) 446, 529. HR ESI-MS (positive): m/z calcd for [C<sub>59</sub>H<sub>42</sub>N<sub>2</sub>S<sub>2</sub>]<sup>+</sup> : 842.2789 [M]<sup>+</sup> ; found: 842.2790.

**Compound 12:** Compound **12** was synthesized from **8** (120 mg, 0.24 mmol) and **9b** (97 mg, 0.24 mmol) by following the general procedure described above. Yield 8% (15 mg); <sup>1</sup>H NMR (500 MHz, CDCl<sub>3</sub>) δ 7.90 (d, *J* = 7.8 Hz, 1H), 7.81 (d, *J* = 7.8 Hz, 1H), 7.77 (s, 1H), 7.53 (d, *J* = 7.8 Hz, 2H), 7.45 (d, *J* = 7.7 Hz, 1H), 7.31 (dd, *J* = 13.4, 7.6 Hz, 3H), 7.25 (d, *J* = 10.7 Hz, 5H), 7.21 (dd, *J* = 14.2, 7.9 Hz, 4H), 7.11 – 7.06 (m, 3H), 7.04 (s, 1H), 6.95 (d, *J* = 5.7 Hz, 1H), 6.80 (s, 1H), 6.49 (d, *J* = 5.7 Hz, 1H), 6.37 (d, *J* = 3.4 Hz, 1H), 6.24 (d, *J* = 3.4 Hz, 1H), 5.98 (s, 1H), 5.80 (s, 1H), 5.63 (s, 1H), 5.42 (s, 1H), 4.49 (s, 1H), 3.74 (d, *J* = 22.0 Hz, 1H), 3.46 (d, *J* = 22.2 Hz, 1H), 2.44 (s, 3H), 2.41 (s, 3H), 2.39 (s, 3H), 2.33 (s, 3H). <sup>13</sup>C NMR (126 MHz, CDCl<sub>3</sub>) δ 144.96, 144.71, 142.80, 141.53, 141.35, 139.91, 139.58, 138.56, 138.37, 137.95, 137.36, 136.79, 136.40, 136.28, 136.02, 135.85, 133.01, 131.75, 131.68, 131.01, 130.89, 129.66, 129.07, 128.93, 128.64, 127.88, 127.39, 126.84, 126.19, 125.95, 124.22, 122.87, 122.08, 120.48, 119.82, 111.64, 111.06, 107.14, 106.51, 44.92, 37.07, 34.07, 29.72, 22.36, 21.31, 21.25, 21.09, 21.04. UV-vis (in CHCl<sub>3</sub>, λ<sub>max</sub>/nm) 444, 531. HR ESI-MS (positive): m/z calcd for [C<sub>61</sub>H<sub>46</sub>N<sub>2</sub>S<sub>2</sub>]<sup>+</sup> : 870.3102 [M]<sup>+</sup> ; found: 870.3097.

**Compound 13:** Compound **13** was synthesized from **8** (120 mg, 0.24 mmol) and **9c** (105 mg, 0.24 mmol) by following the general procedure described above. Yield 7% (14 mg); <sup>1</sup>H NMR (500 MHz, CDCl<sub>3</sub>) δ 7.87 (d, *J* = 7.9 Hz, 1H), 7.78 (d, *J* = 7.8 Hz, 1H), 7.74 (s, 1H), 7.54 (d, *J* = 8.5 Hz, 2H), 7.42 (d, *J* = 7.8 Hz, 1H), 7.30 (d, *J* = 7.8 Hz, 4H), 7.23 (d, *J* = 7.4 Hz, 2H), 7.22 – 7.13 (m, 4H), 7.07 (d, *J* = 8.4 Hz, 2H), 7.03 – 6.95 (m, 2H), 6.90 (d, *J* = 5.7 Hz, 1H), 6.80 (d, *J* = 8.4 Hz, 2H), 6.76 (s, 1H), 6.46 (d, *J* = 5.8 Hz, 1H), 6.34 (d, *J* = 3.4 Hz, 1H), 6.20 (d, *J* = 3.4 Hz, 1H), 5.95 (s, 1H), 5.77 (s, 1H), 5.59 (s, 1H), 5.38 (s, 1H), 4.46 (s, 1H), 3.85 (s, 1H), 3.77 (s, 3H),



3.71 (d,  $J = 22.0$  Hz, 4H), 3.43 (d,  $J = 22.0$  Hz, 1H), 2.41 (s, 3H), 2.36 (s, 3H).  $^{13}\text{C}$  NMR (126 MHz,  $\text{CDCl}_3$ )  $\delta$  158.06, 145.14, 144.71, 141.30, 141.09, 139.96, 139.56, 138.61, 138.40, 137.90, 136.78, 136.29, 136.03, 133.06, 132.82, 131.87, 131.72, 130.90, 129.07, 129.02, 128.93, 128.63, 127.20, 127.06, 126.68, 126.61, 126.15, 124.18, 122.83, 121.99, 120.49, 119.83, 114.48, 113.70, 111.67, 107.12, 106.46, 55.38, 55.27, 49.96, 44.52, 37.06, 21.32, 21.10. UV-vis (in  $\text{CHCl}_3$ ,  $\lambda_{\text{max}}/\text{nm}$ ) 449, 539. HR ESI-MS (positive):  $m/z$  calcd for  $[\text{C}_{61}\text{H}_{46}\text{N}_2\text{O}_2\text{S}_2]^+$  : 902.3001  $[\text{M}]^+$  ; found: 902.3011.

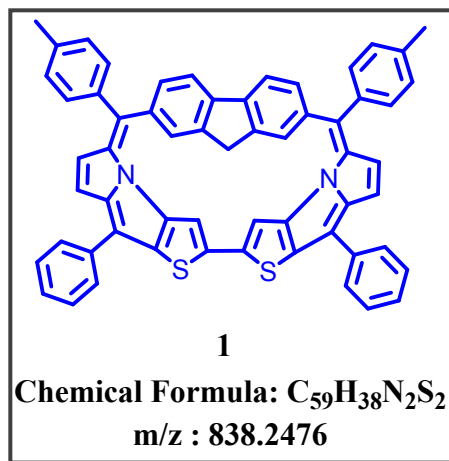

**Observed Mass: 838.2475 [M<sup>+</sup>]**

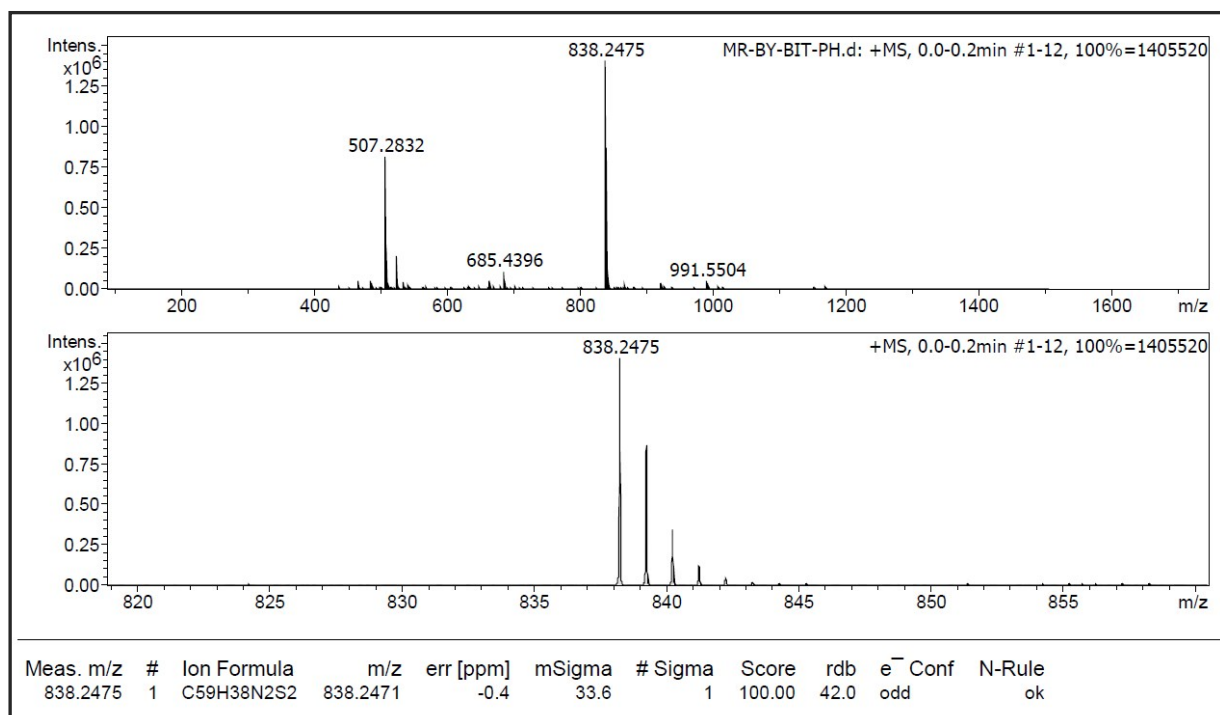

**Figure S1.** HRMS spectrum of compound **1**.

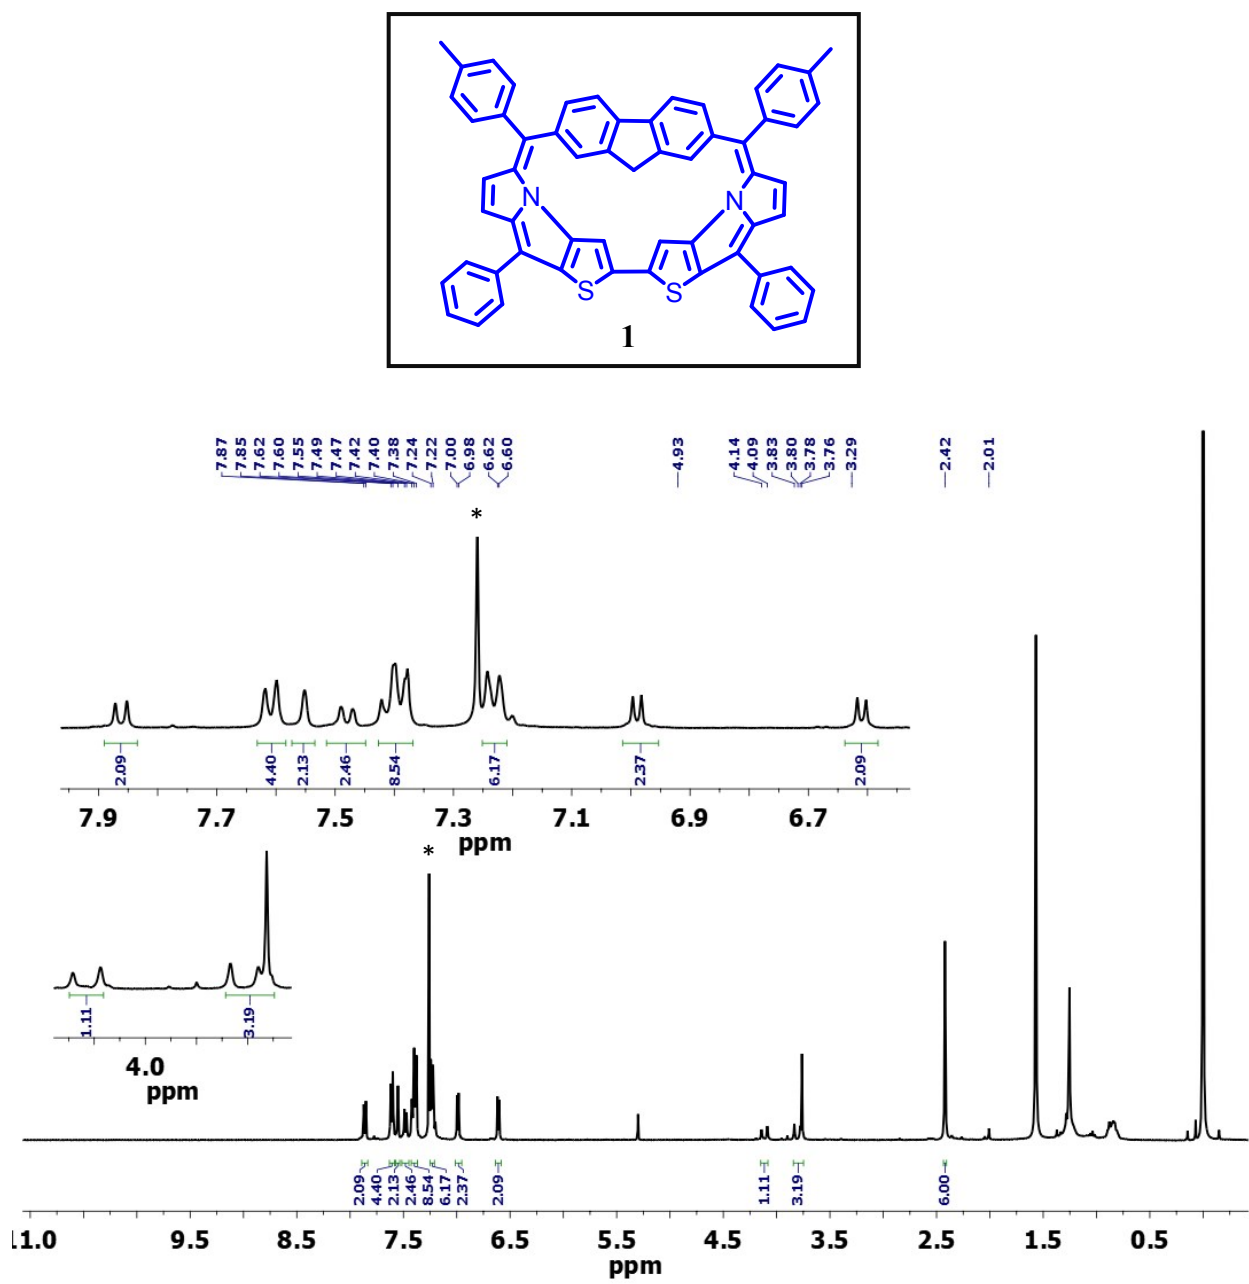

Figure S2.  $^1\text{H NMR}$  of compound **1** recorded in  $\text{CDCl}_3$ .

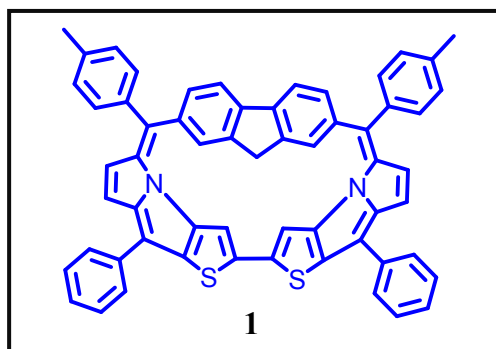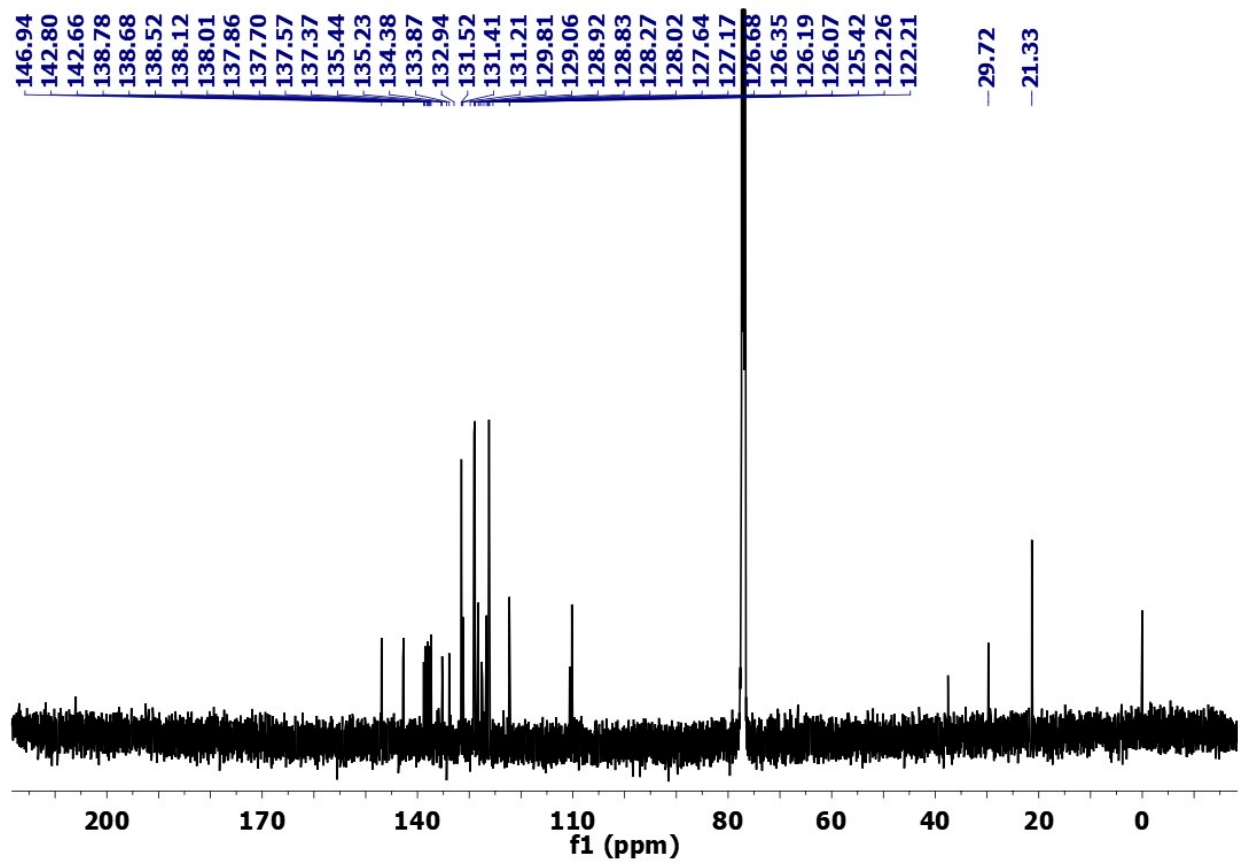

Figure S3.  $^{13}\text{C}$  NMR of compound **1** recorded in  $\text{CDCl}_3$ .

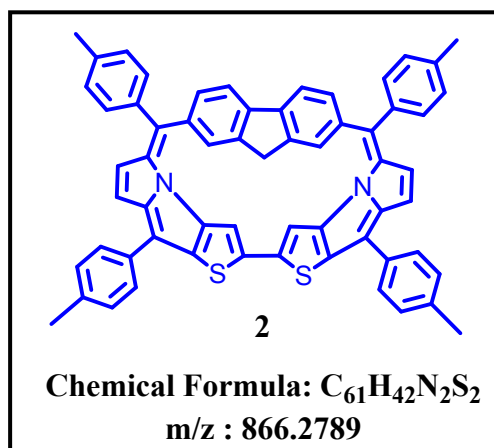

**Observed Mass: 866.2786 [M<sup>+</sup>]**

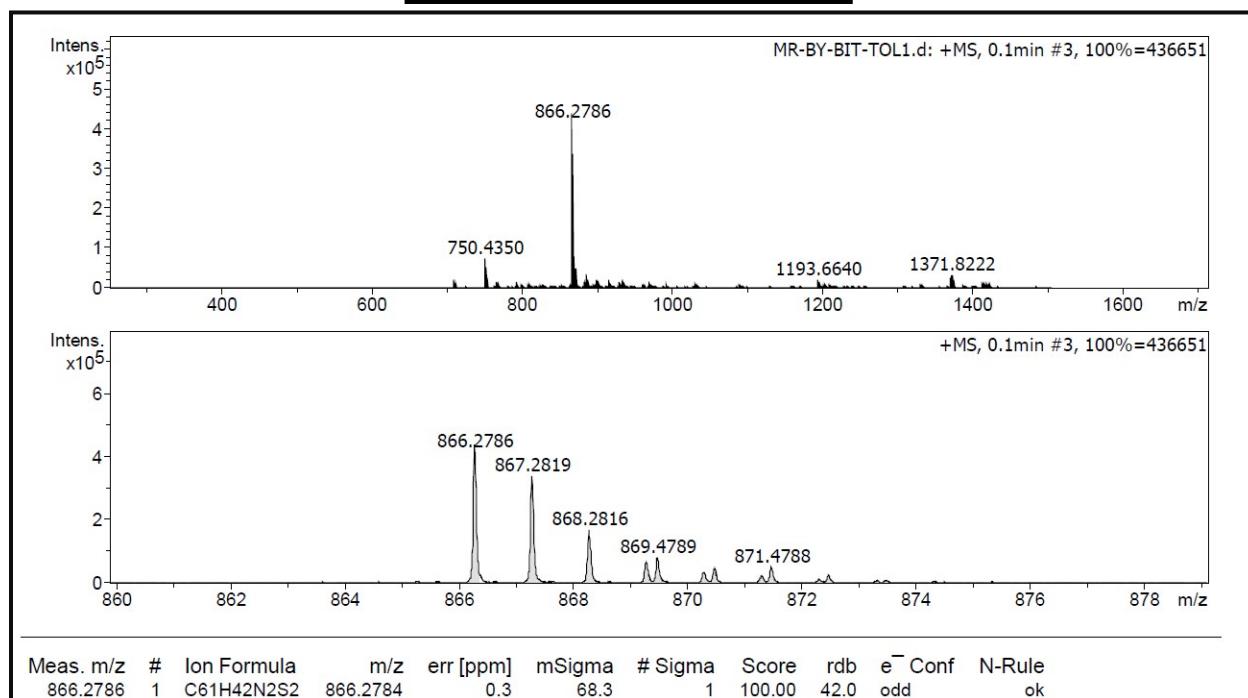

**Figure S4.** HRMS spectrum of compound **2**.

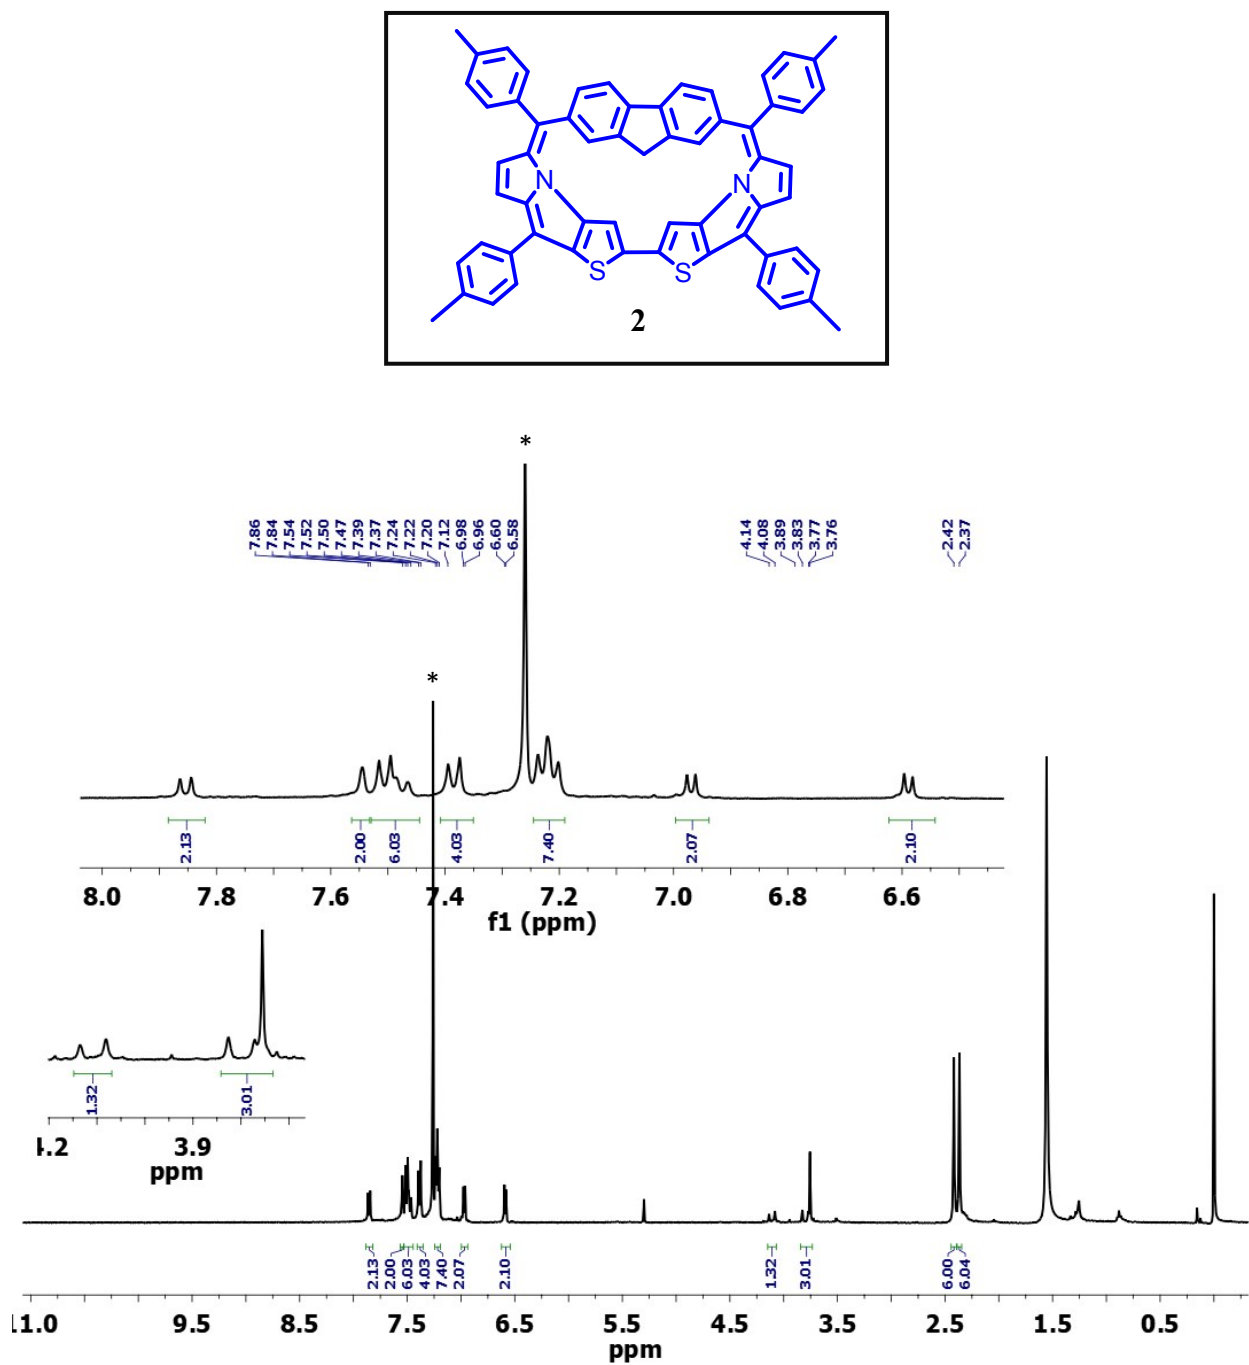

Figure S5.  $^1\text{H}$  NMR of compound **2** recorded in  $\text{CDCl}_3$

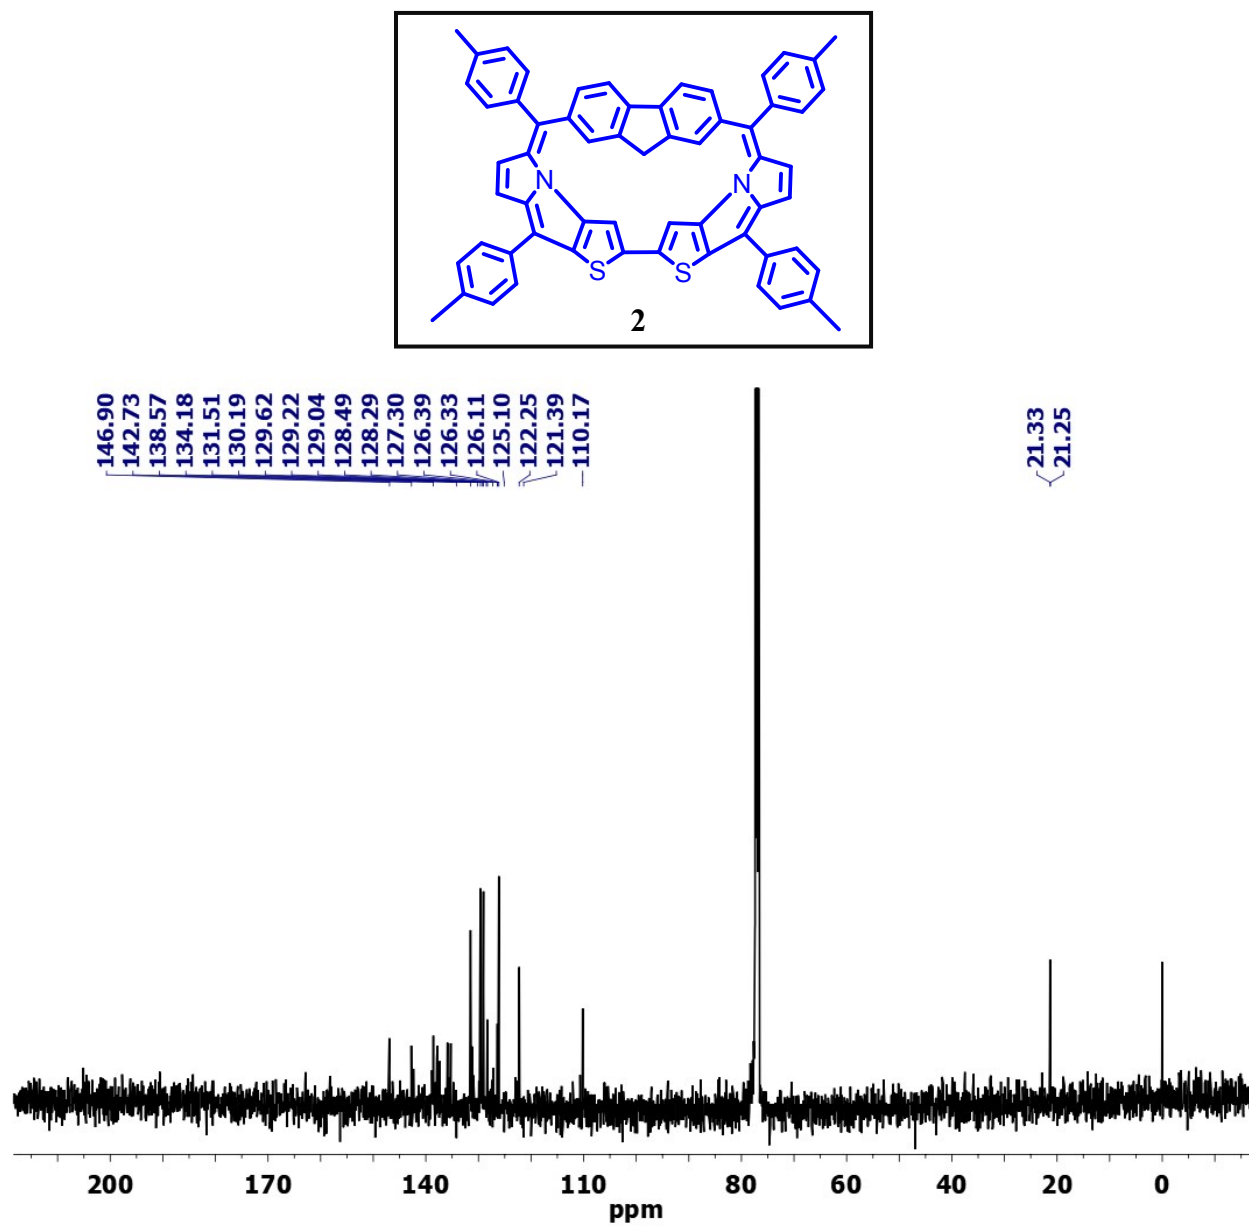

Figure S6.  $^{13}\text{C}$  NMR of compound 2 recorded in  $\text{CDCl}_3$ .

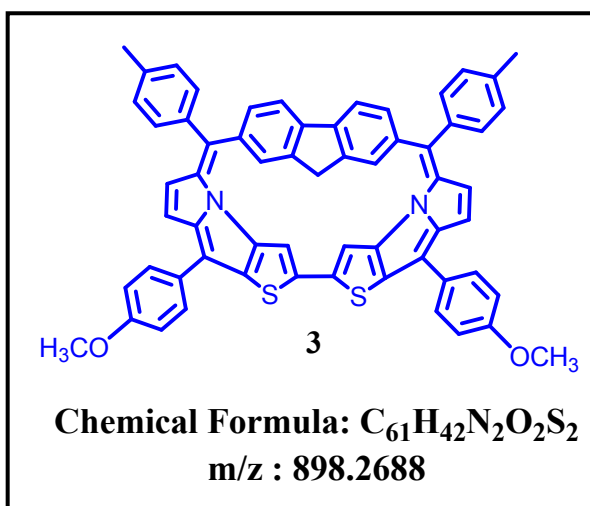

**Observed Mass: 898.2679 [M<sup>+</sup>]**

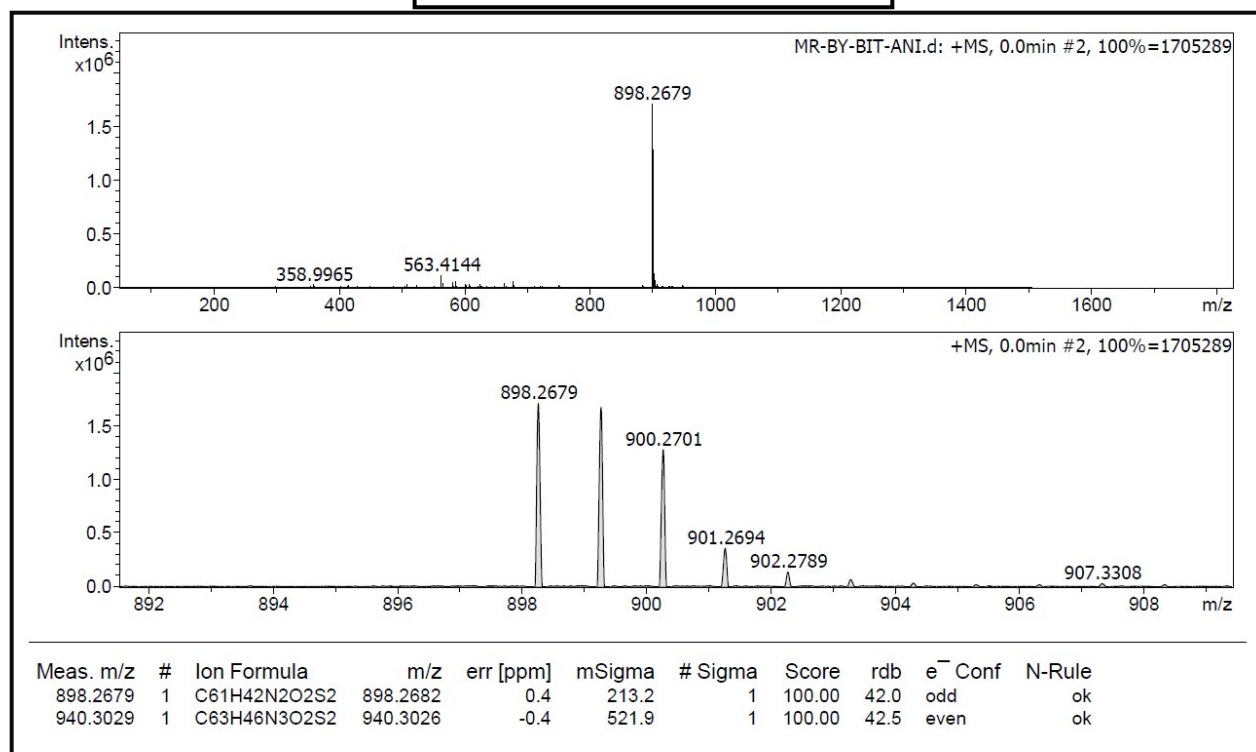

**Figure S7. HRMS spectrum of compound 3.**



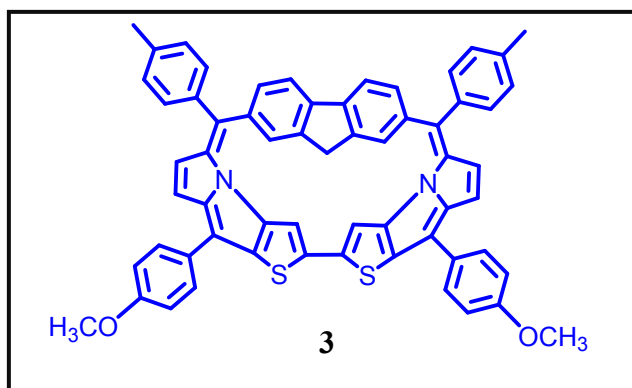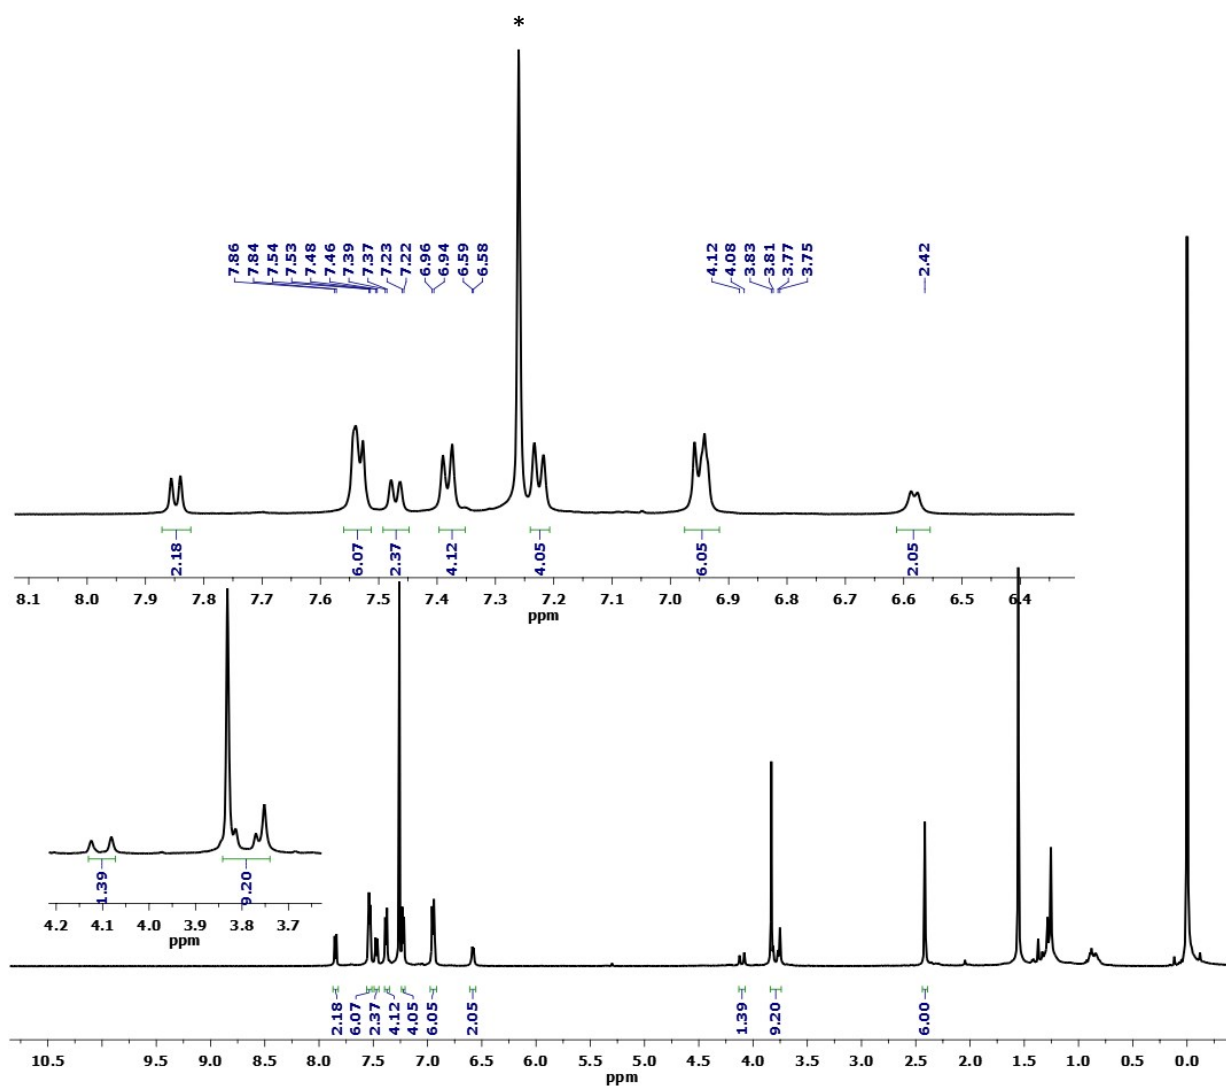

Figure S8.  $^1\text{H}$  NMR of compound **3** recorded in  $\text{CDCl}_3$ .

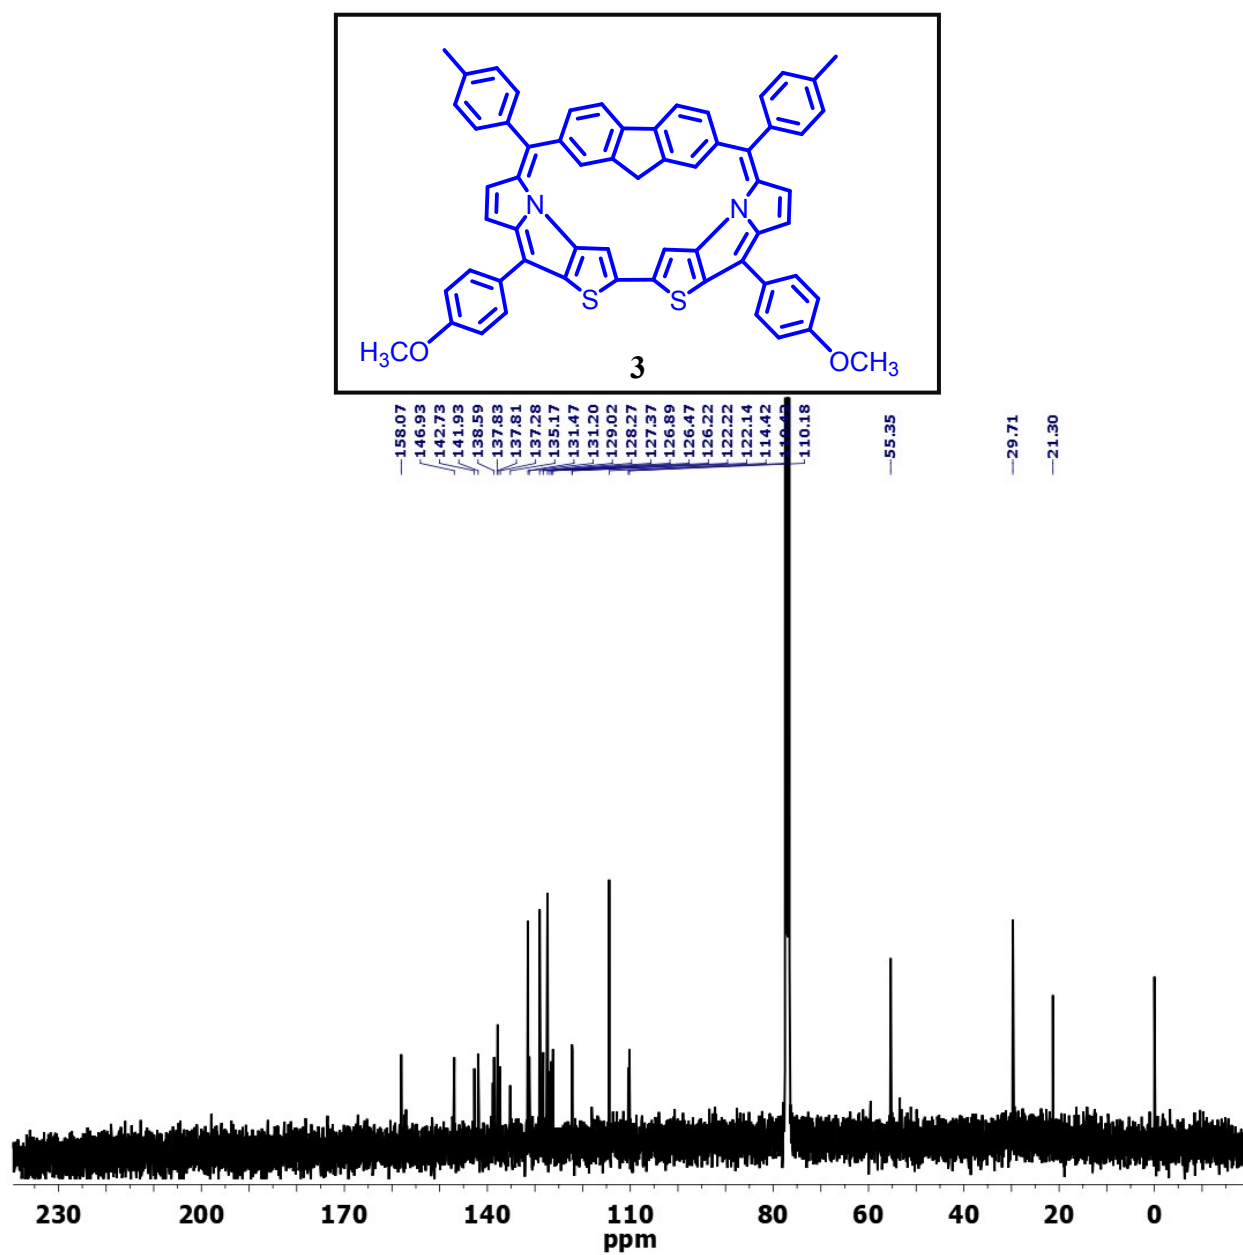

Figure S9.  $^{13}\text{C}$  NMR of compound **3** recorded in  $\text{CDCl}_3$ .

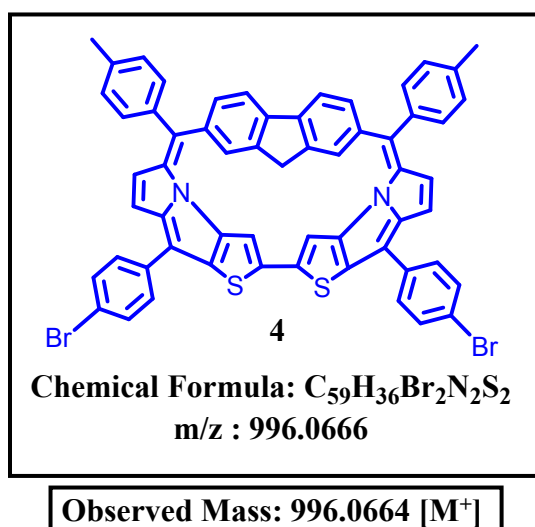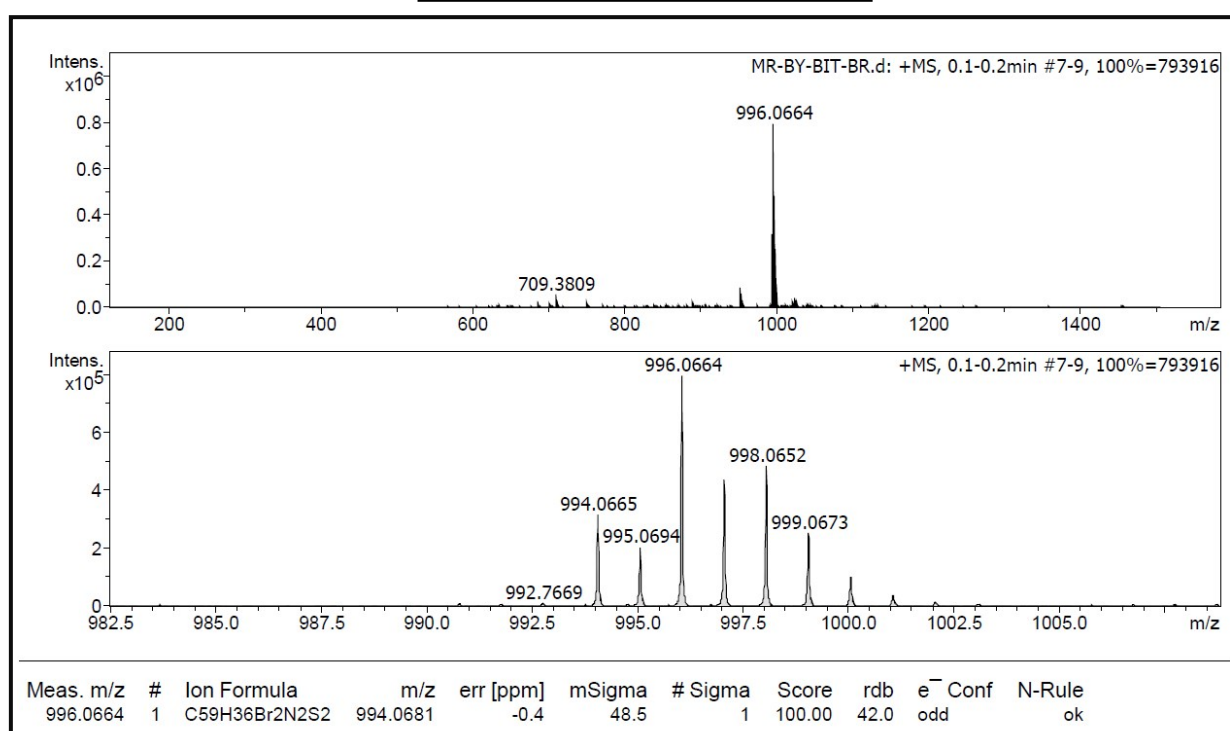

**Figure S10.** HRMS spectrum of compound **4**.

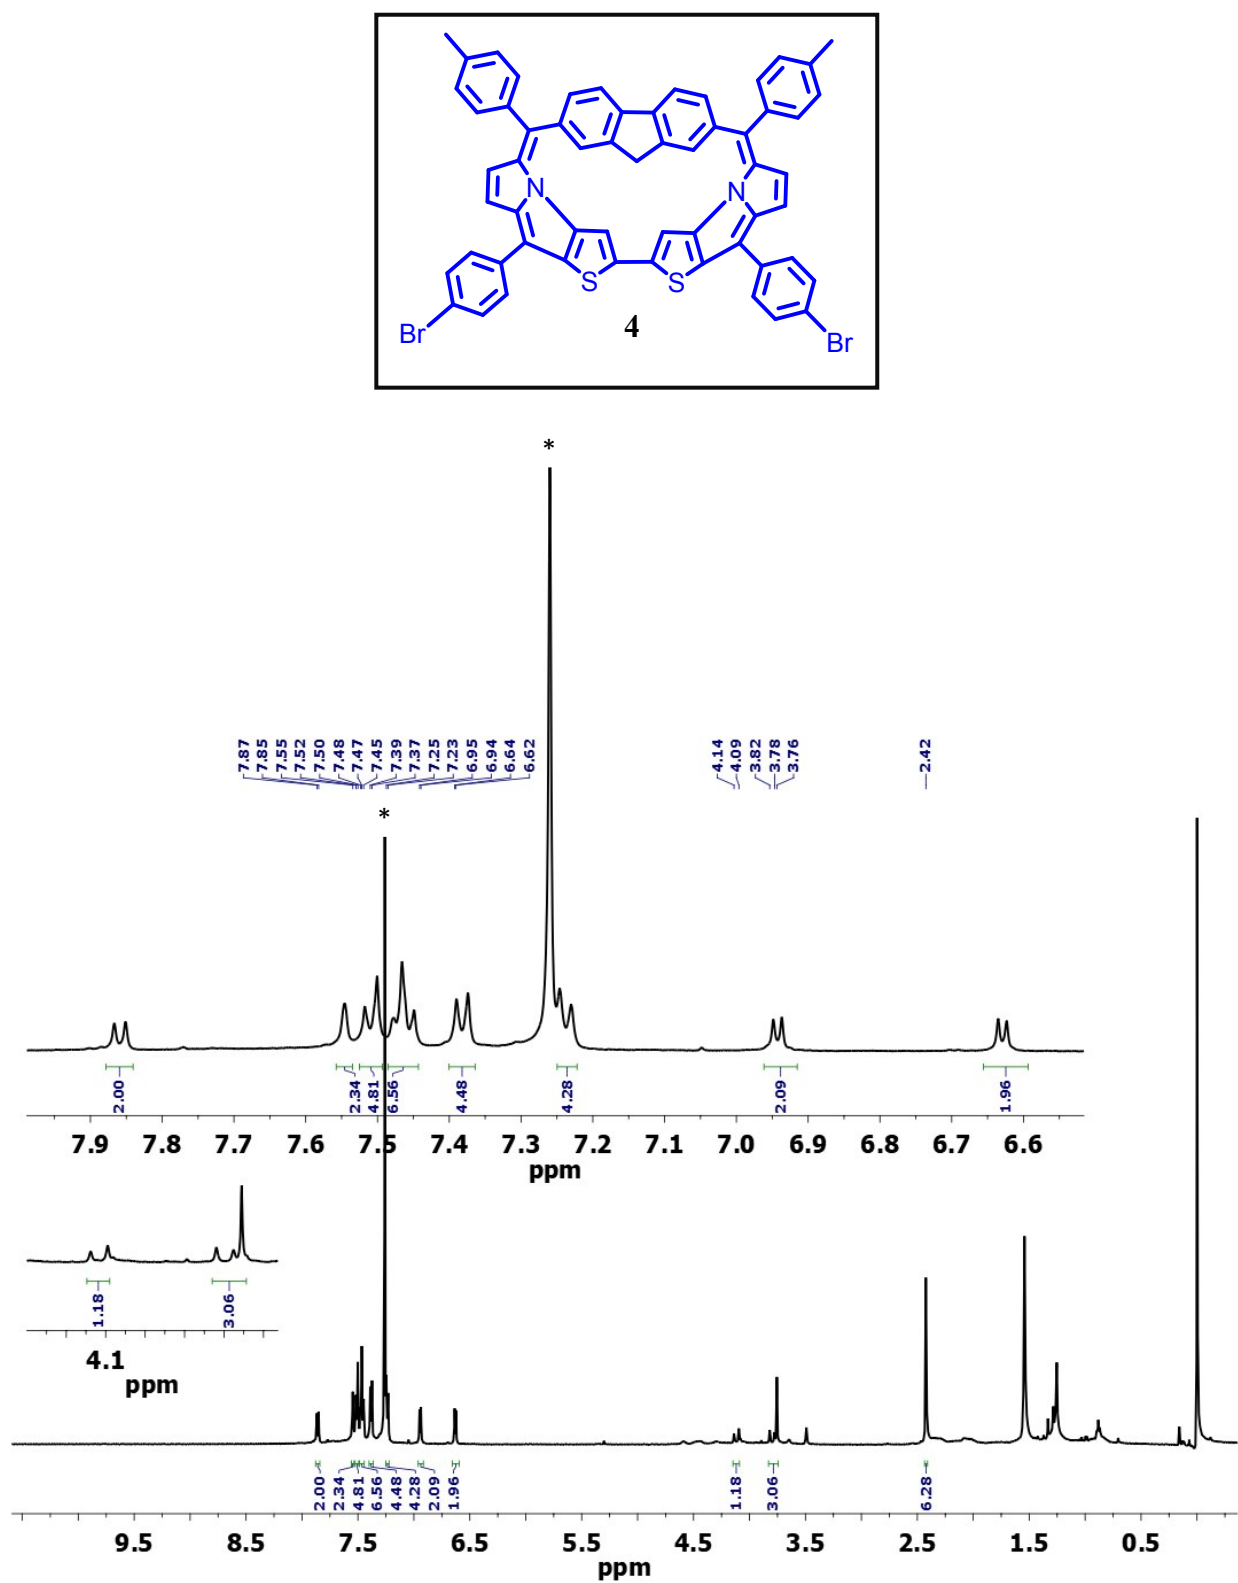

Figure S11.  $^1\text{H}$  NMR of compound **4** recorded in  $\text{CDCl}_3$ .

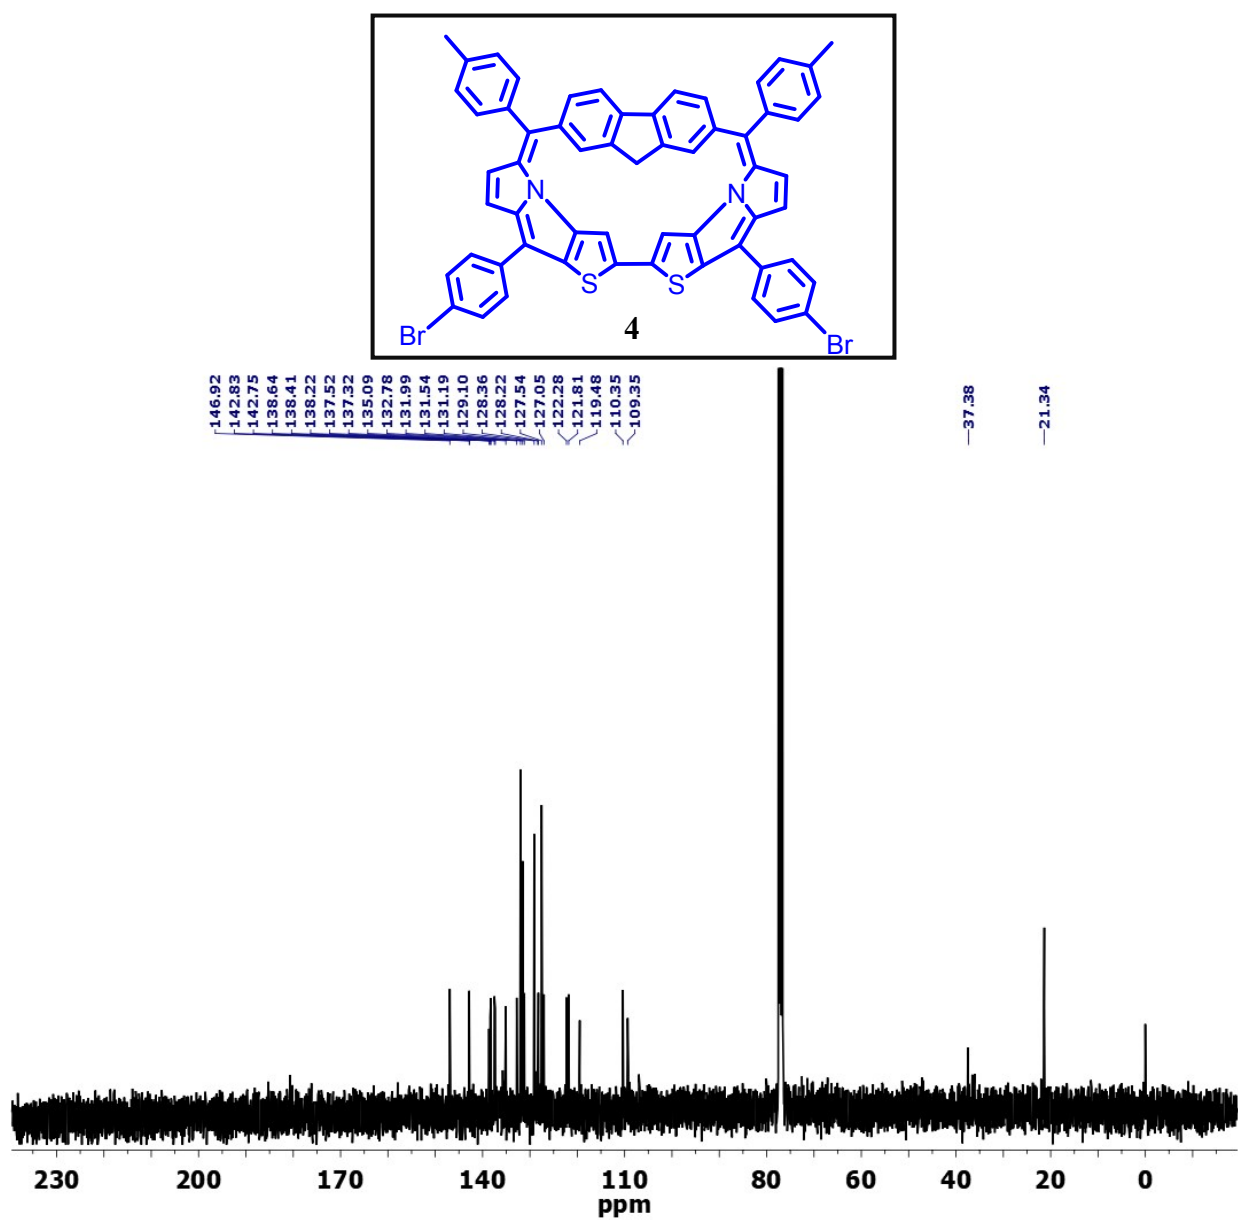

Figure S12.  $^{13}\text{C}$  NMR of compound 4 recorded in  $\text{CDCl}_3$ .

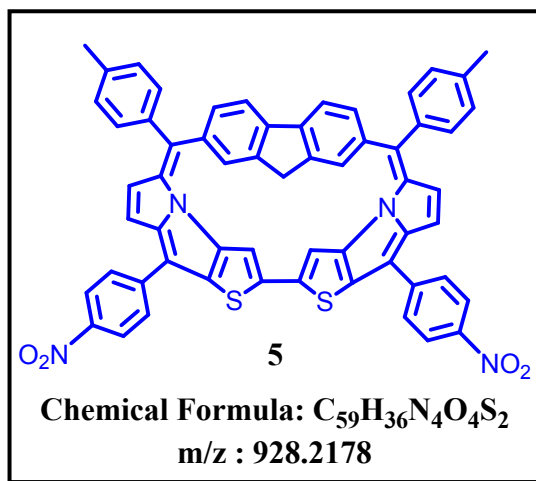

**Observed Mass: 928.2172 [M<sup>+</sup>]**

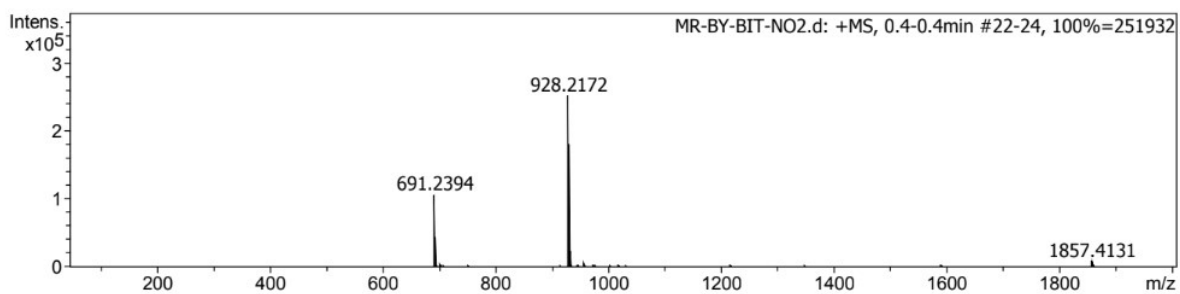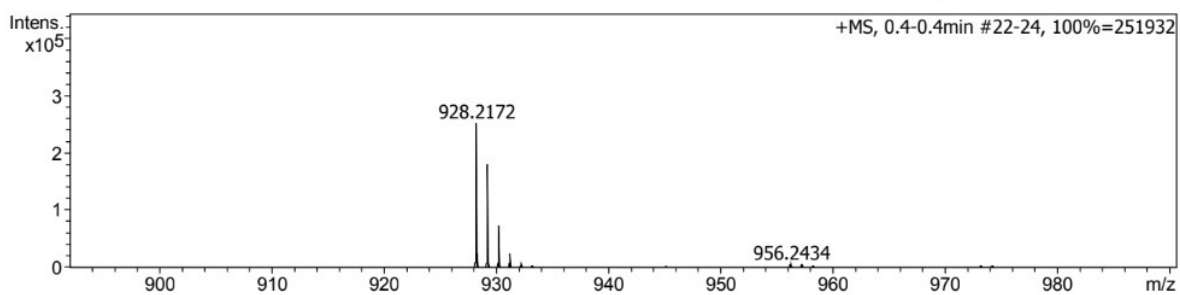

| Meas. m/z | # | Ion Formula                                                                  | m/z      | err [ppm] | mSigma | # Sigma | Score  | rdb  | e <sup>-</sup> Conf | N-Rule |
|-----------|---|------------------------------------------------------------------------------|----------|-----------|--------|---------|--------|------|---------------------|--------|
| 928.2172  | 1 | C <sub>59</sub> H <sub>36</sub> N <sub>4</sub> O <sub>4</sub> S <sub>2</sub> | 928.2172 | 0.0       | 22.9   | 1       | 100.00 | 44.0 | odd                 | ok     |

**Figure S13.** HRMS spectrum of compound **5**.

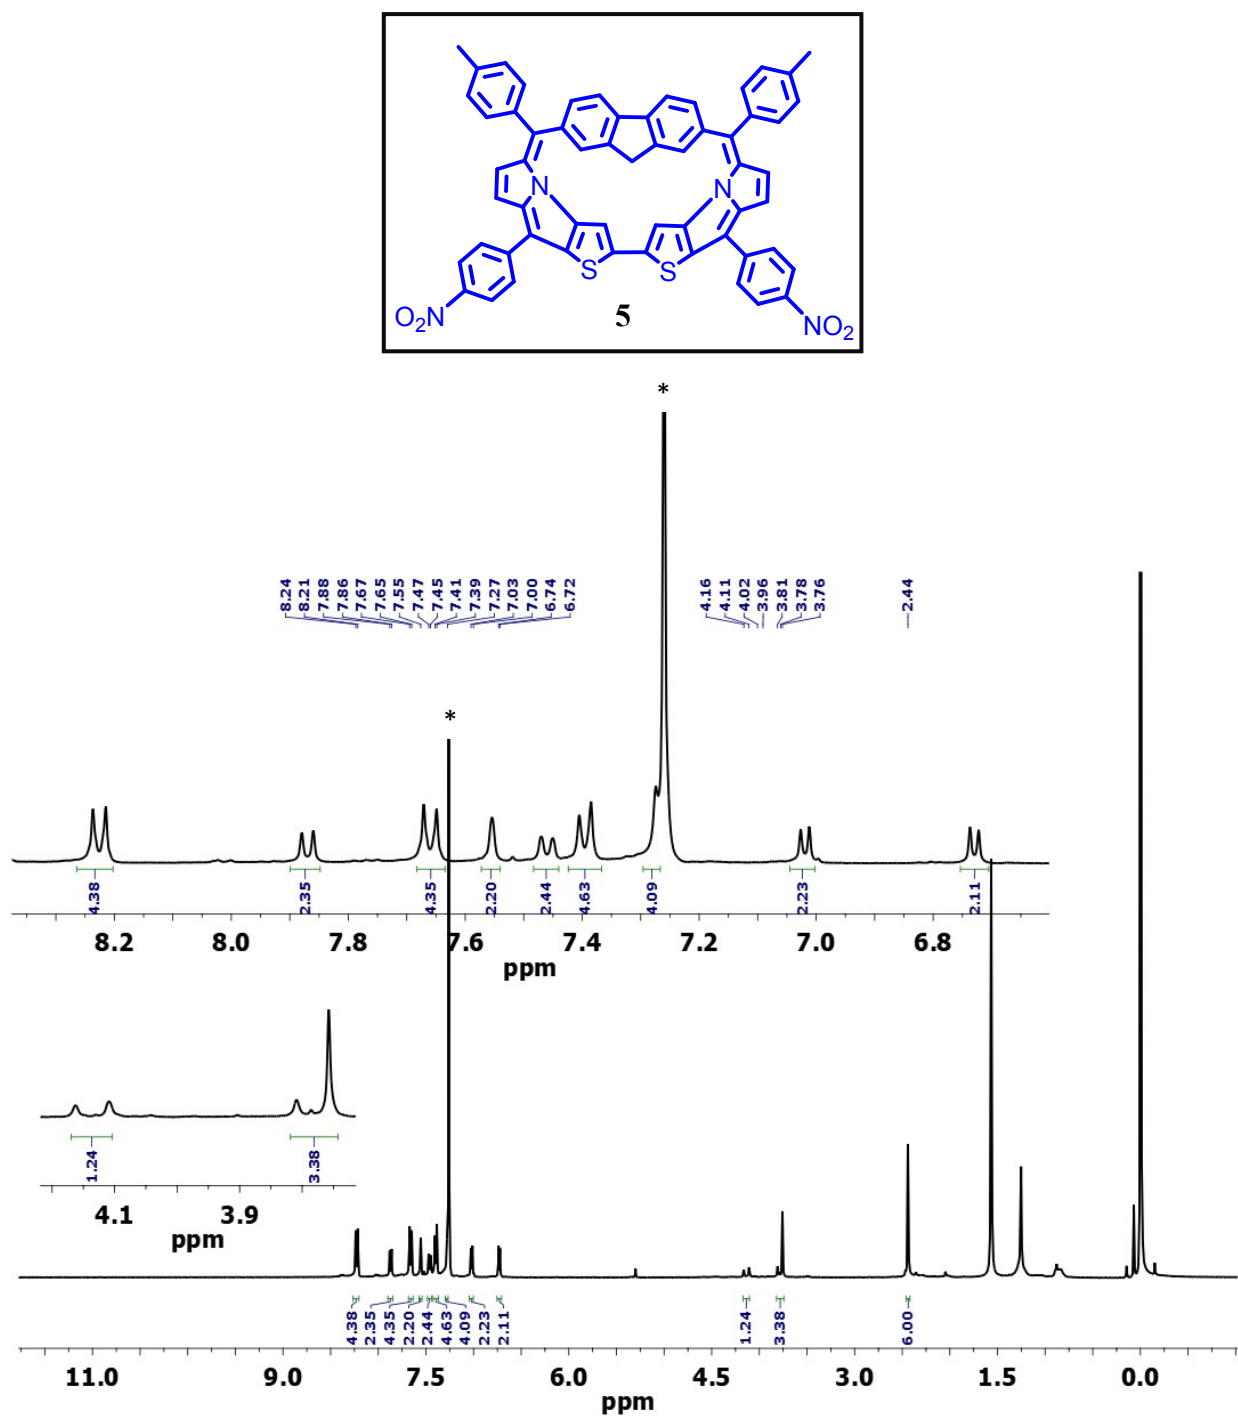

Figure S14.  $^1\text{H}$  NMR of compound **5** recorded in  $\text{CDCl}_3$ .

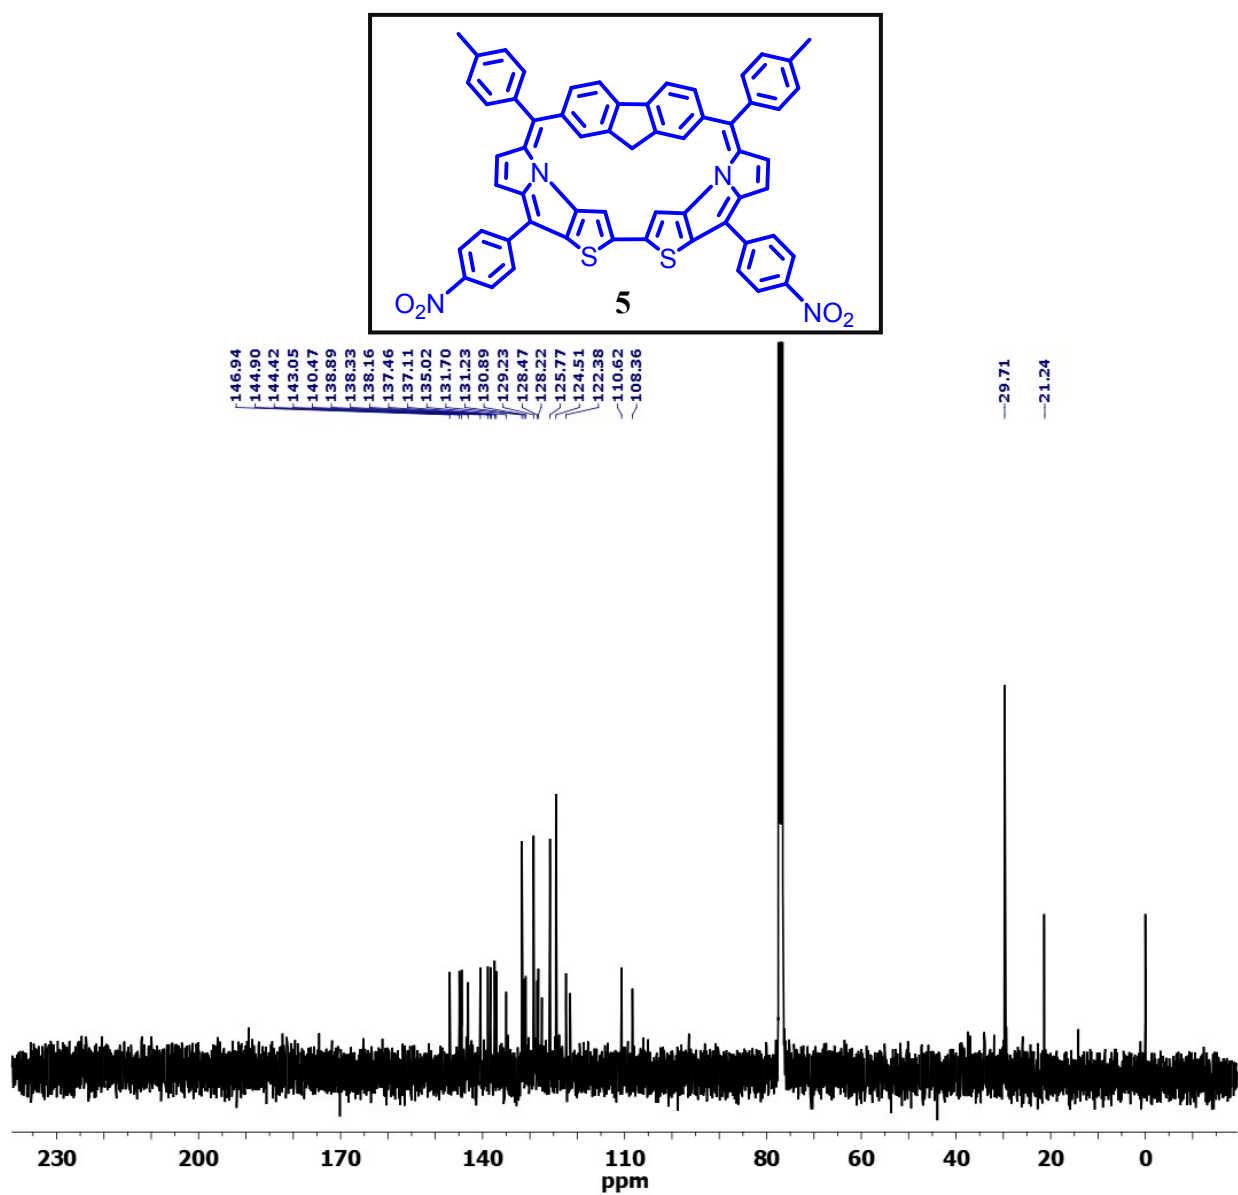

Figure S15.  $^{13}\text{C}$  NMR of compound **5** recorded in  $\text{CDCl}_3$ .



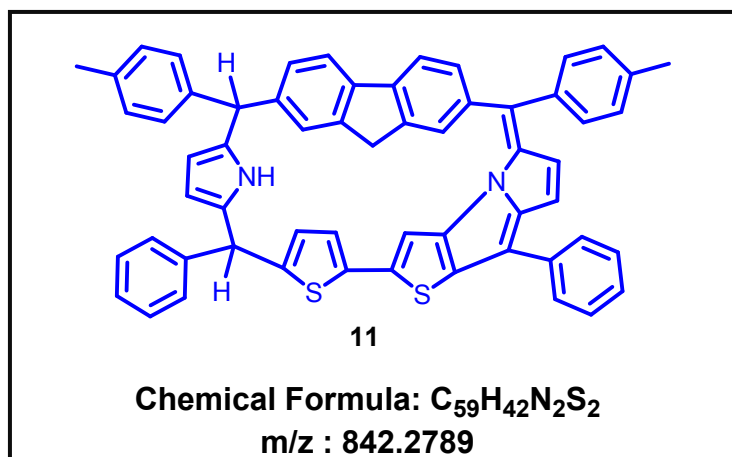

**Observed Mass: 842.2790 [M<sup>+</sup>]**

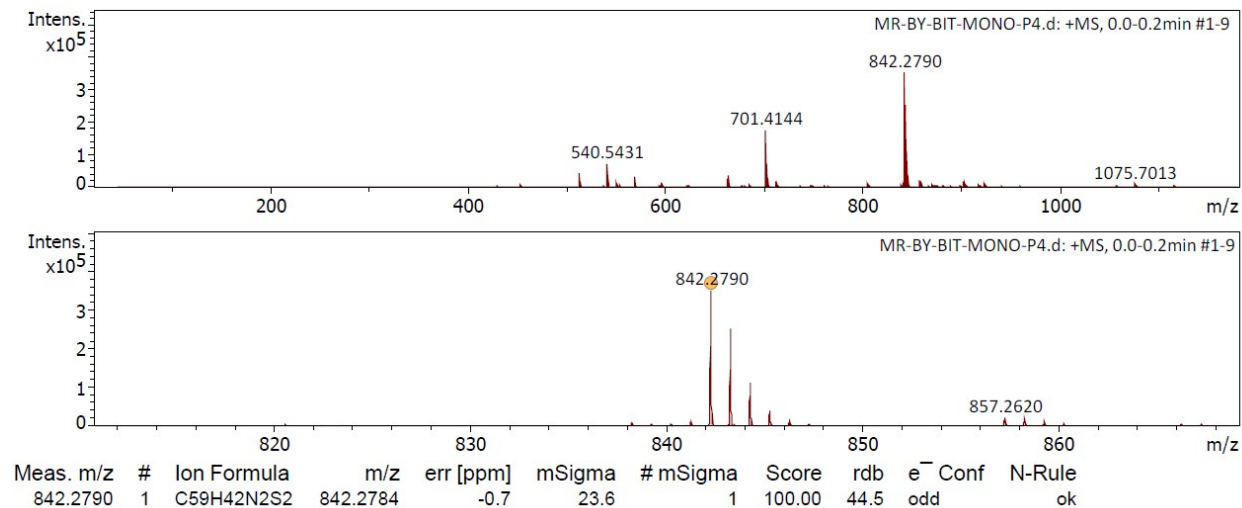

**Figure S16.** HRMS spectrum of compound **11**.

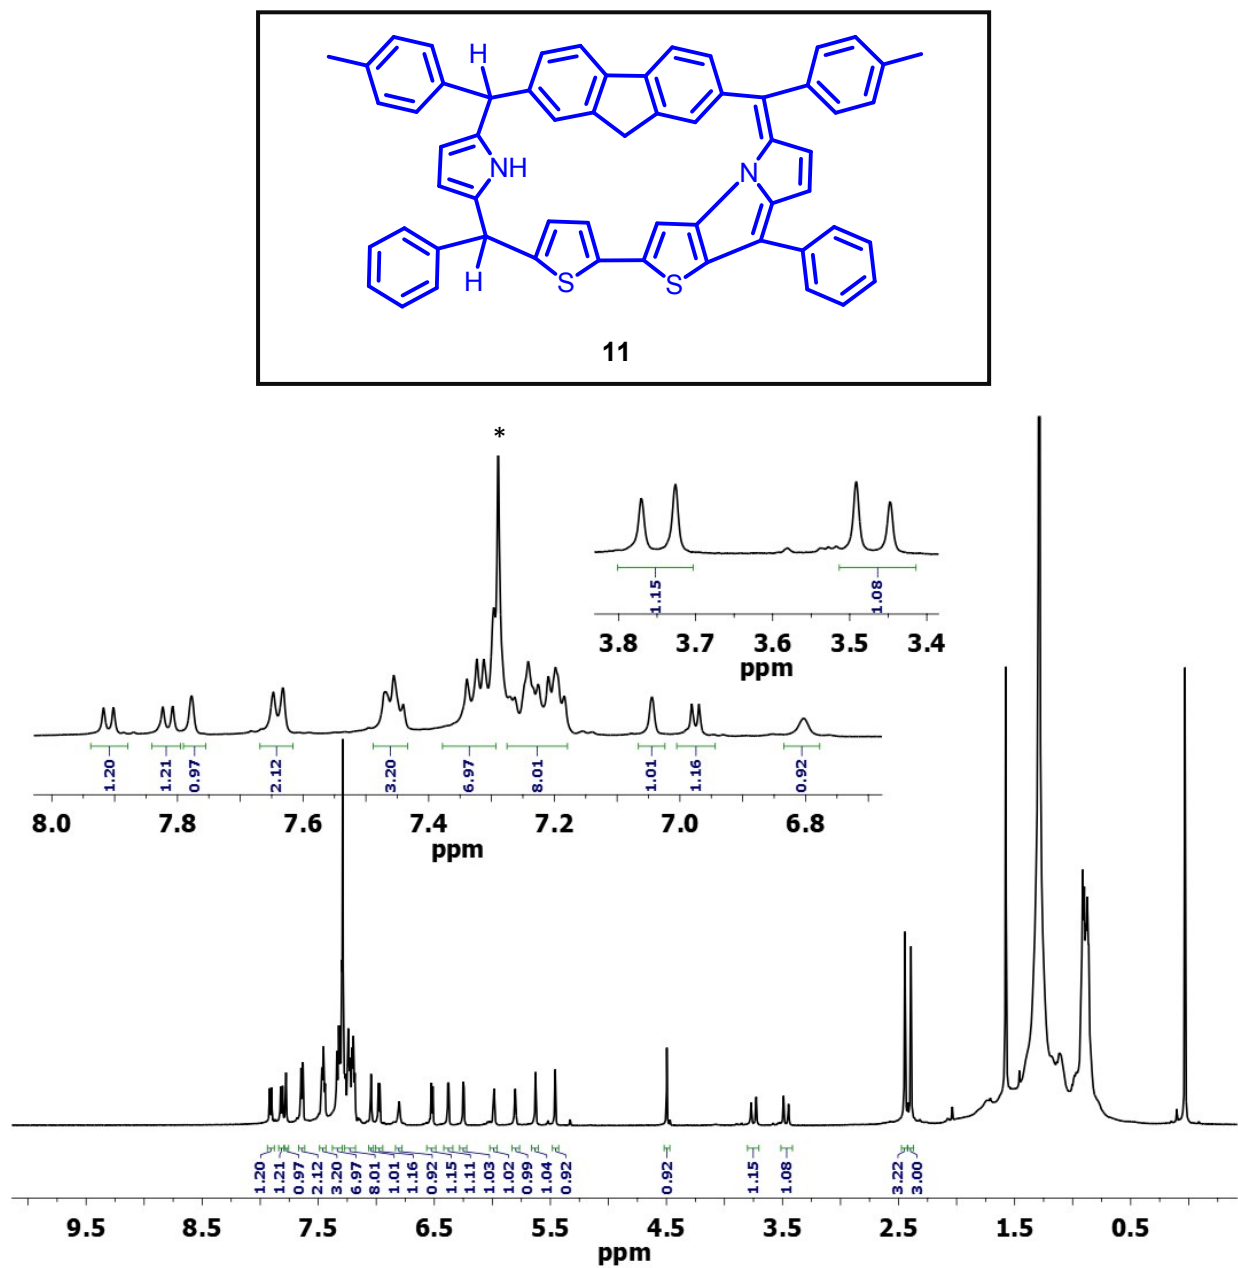

Figure S17.  $^1\text{H}$  NMR of compound **11** recorded in  $\text{CDCl}_3$ .

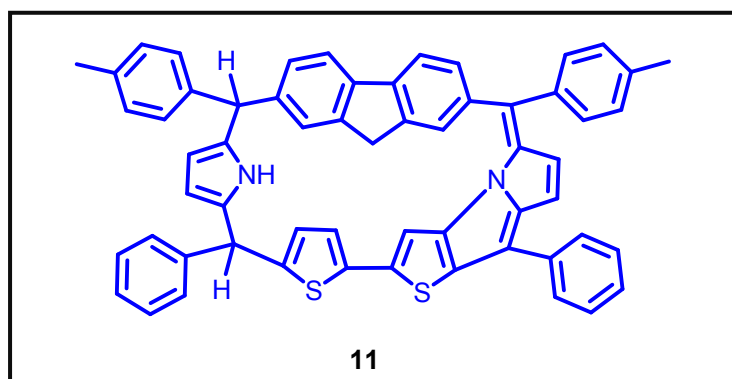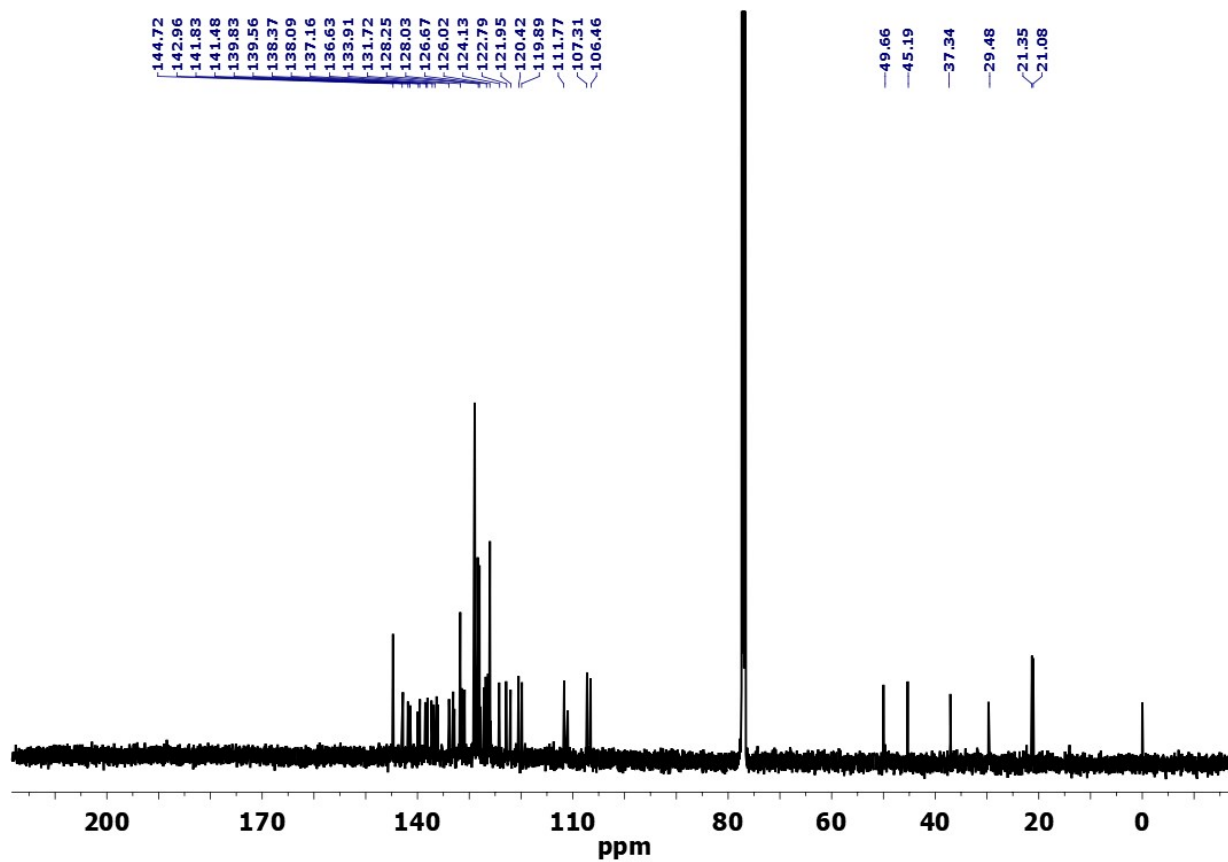

Figure S18.  $^{13}\text{C}$  NMR of compound 11 recorded in  $\text{CDCl}_3$ .

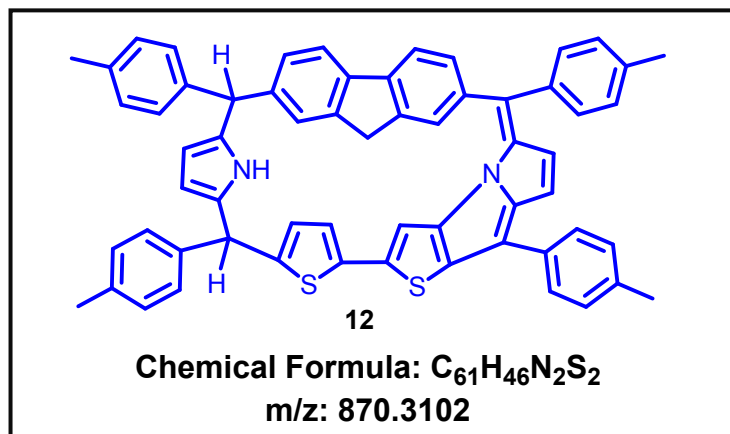

**Observed Mass: 870.3097 [M<sup>+</sup>]**

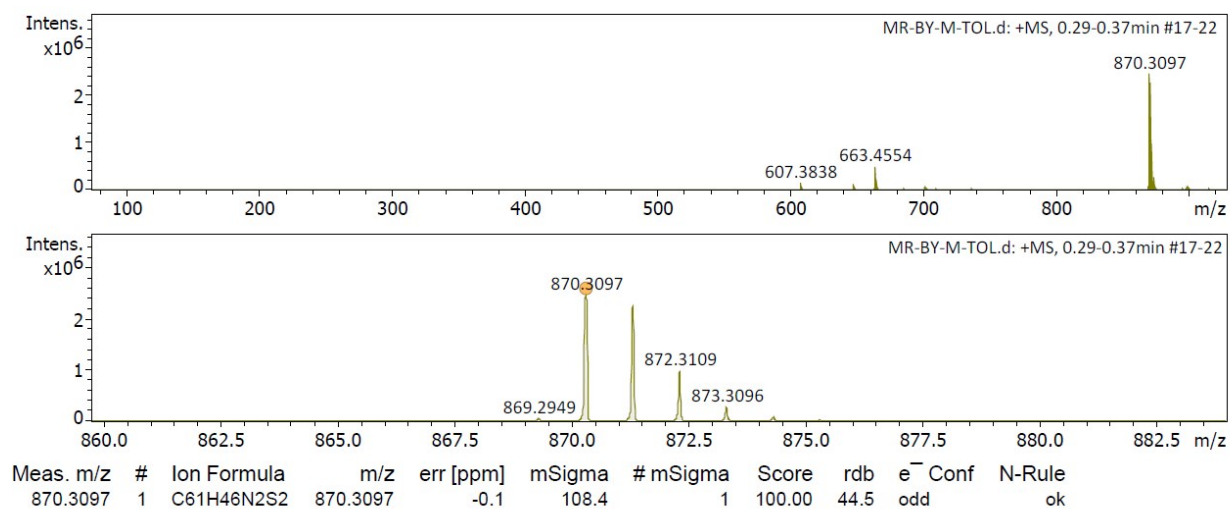

**Figure S19.** HRMS spectrum of compound **12**.

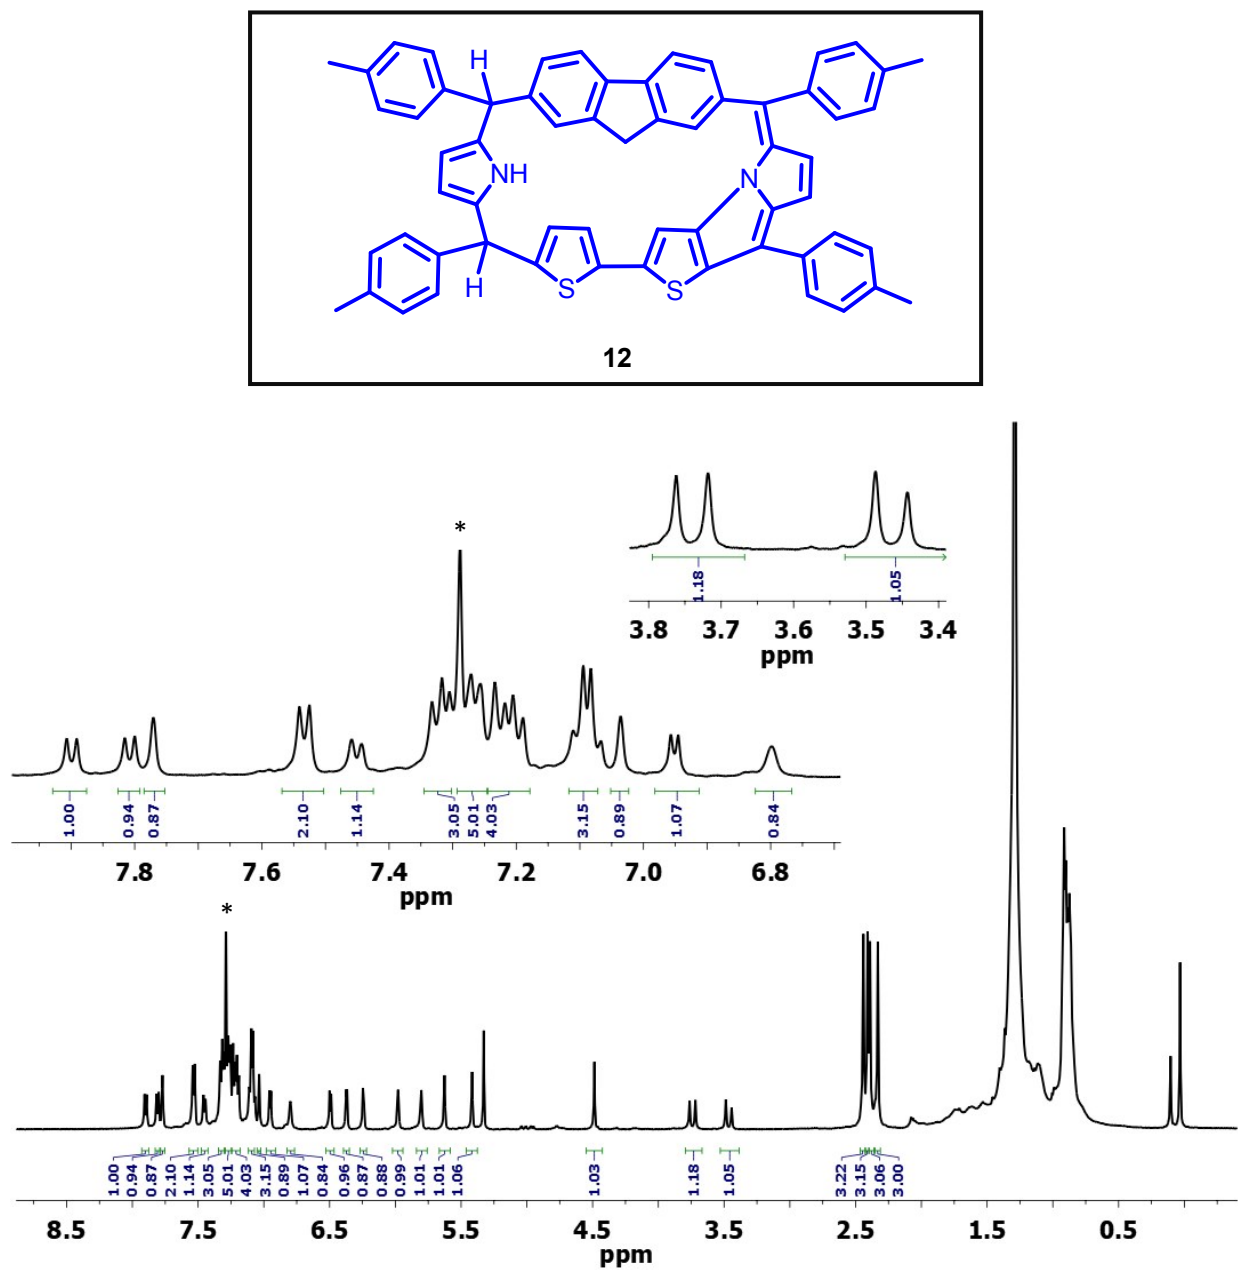

Figure S20.  $^1\text{H}$  NMR of compound **12** recorded in  $\text{CDCl}_3$ .

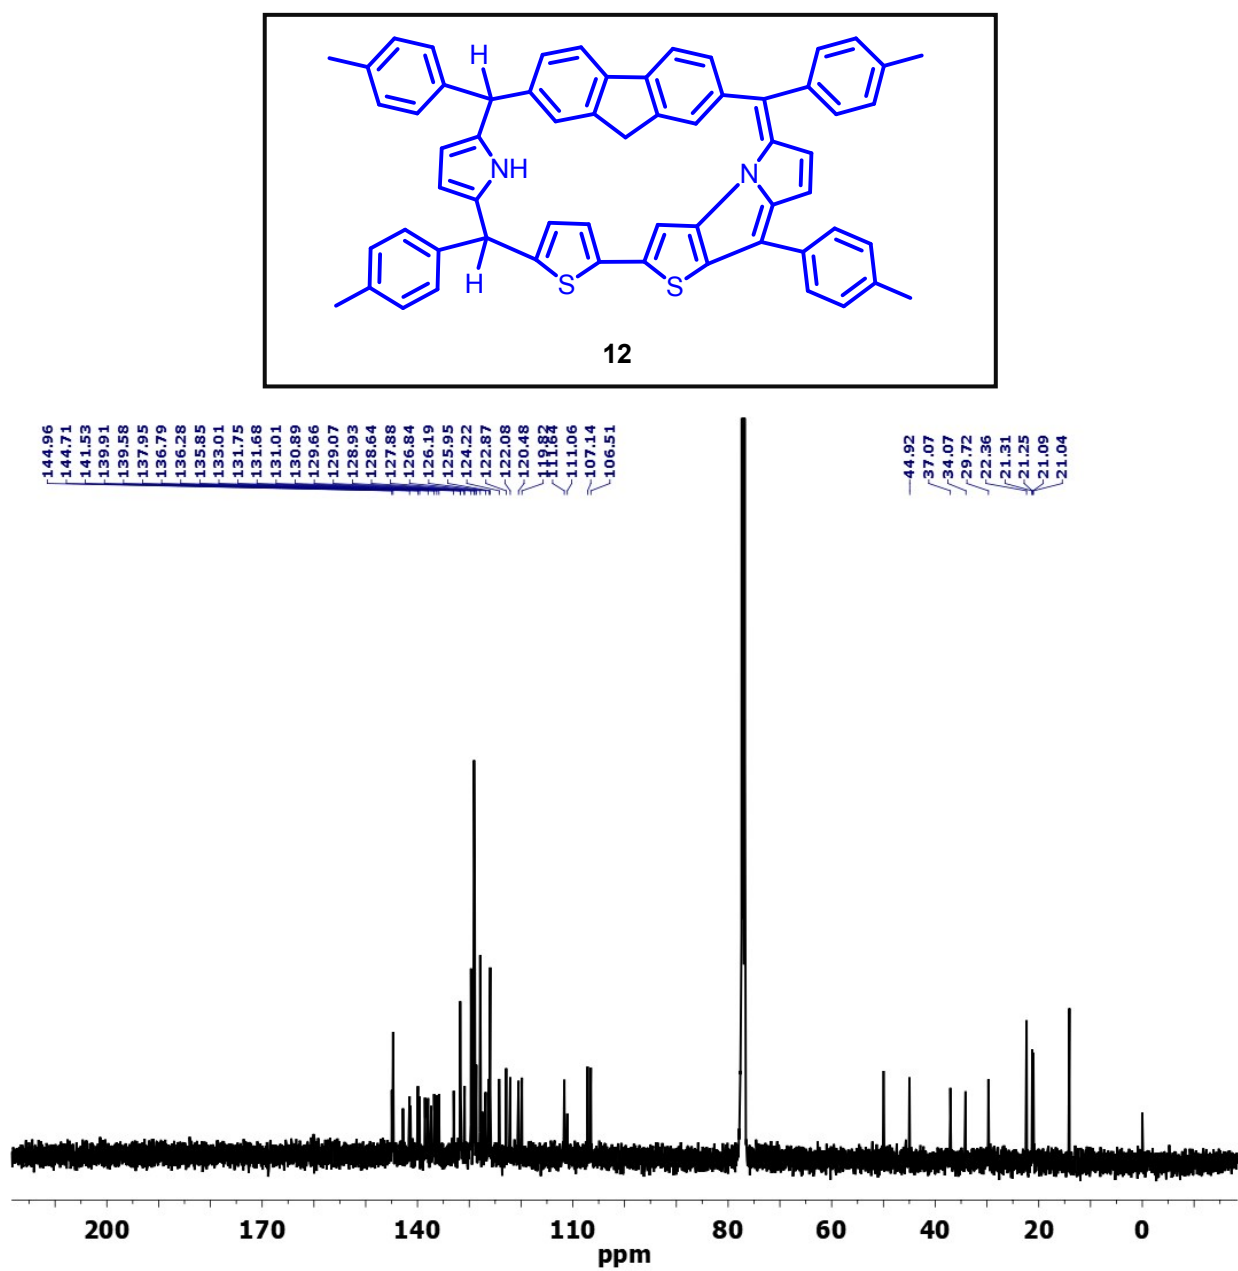

Figure S21.  $^{13}\text{C}$  NMR of compound 12 recorded in  $\text{CDCl}_3$ .

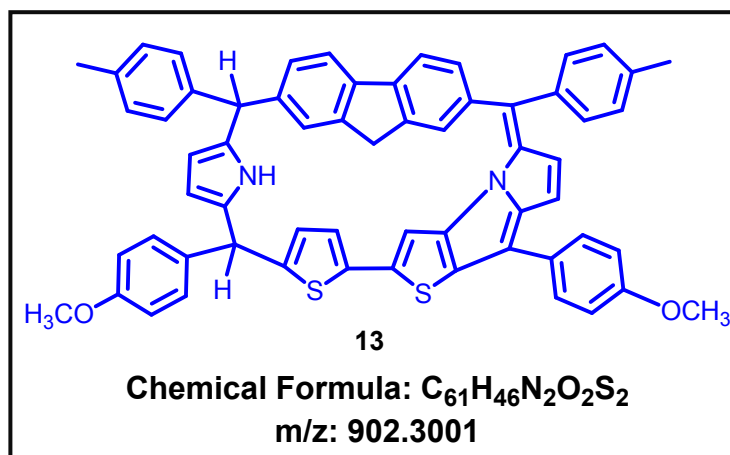

**Observed Mass: 902.3011 [M<sup>+</sup>]**

| Name           | Rack Pos.    | Instrument | Operator                          |
|----------------|--------------|------------|-----------------------------------|
| Inj. Vol. (ul) | Plate Pos.   | IRM Status | Acc. Time (Local)                 |
| Data File      | Method (Acq) | Comment    | 06-01-2021 5:46:13 PM (UTC+05:30) |

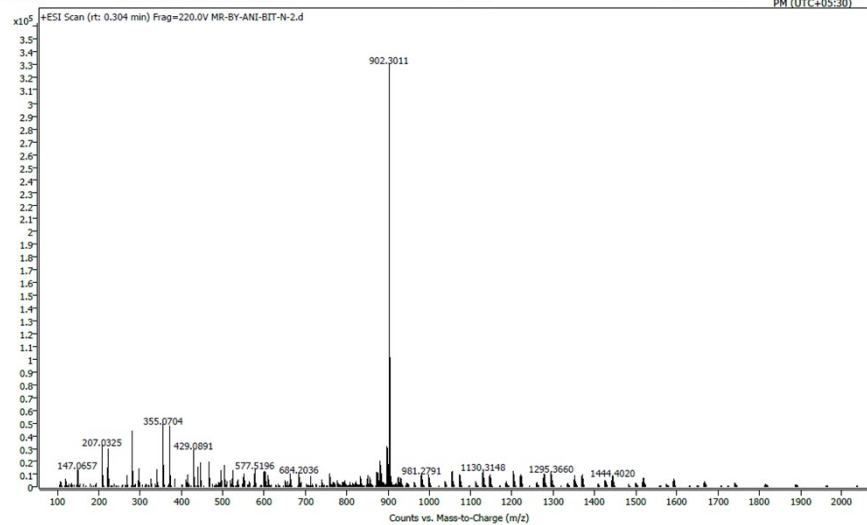

| Name           | Rack Pos.    | Instrument | Operator                          |
|----------------|--------------|------------|-----------------------------------|
| Inj. Vol. (ul) | Plate Pos.   | IRM Status | Acc. Time (Local)                 |
| Data File      | Method (Acq) | Comment    | 06-01-2021 5:46:13 PM (UTC+05:30) |

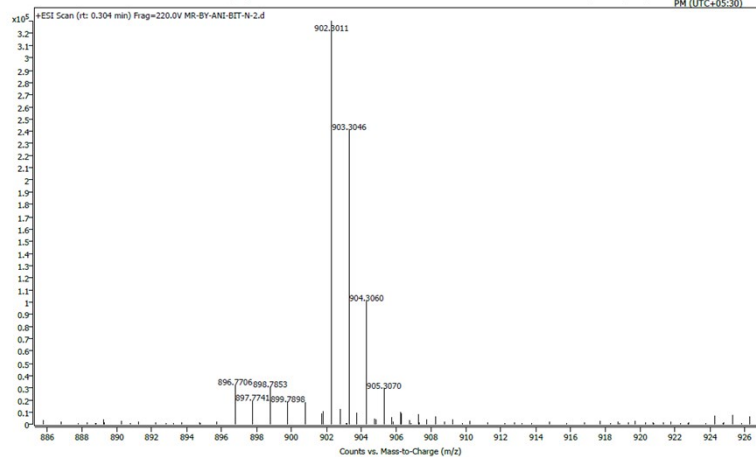

**Figure S22. HRMS spectrum of compound 13.**

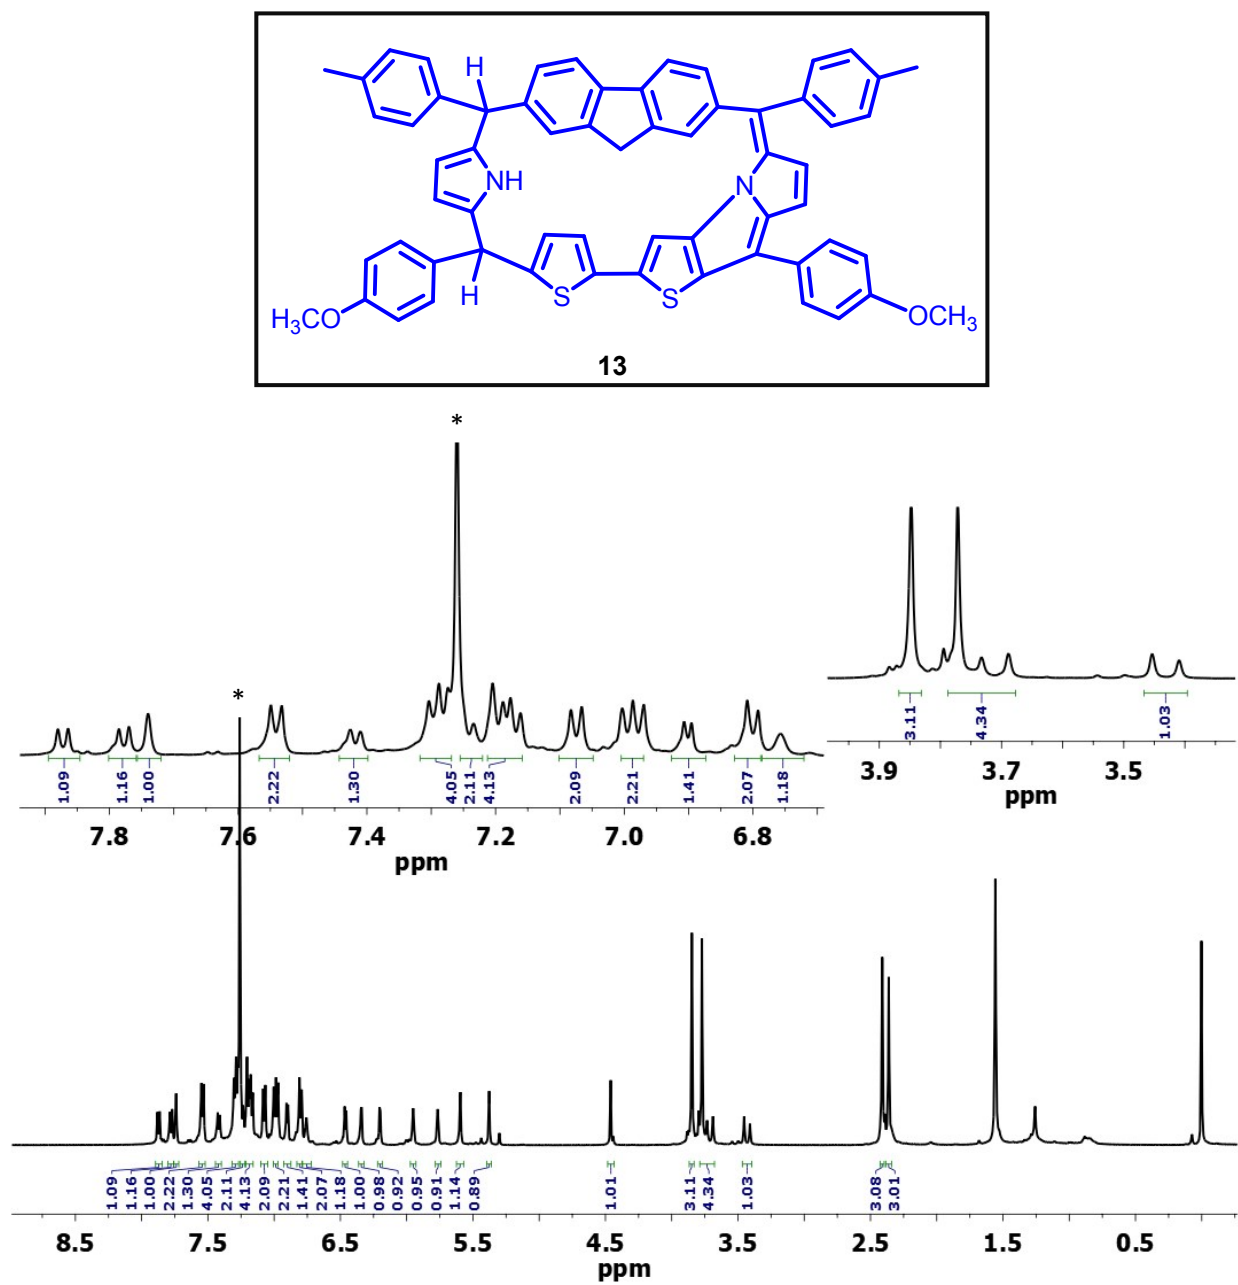

Figure S23.  $^1\text{H}$  NMR of compound **13** recorded in  $\text{CDCl}_3$ .



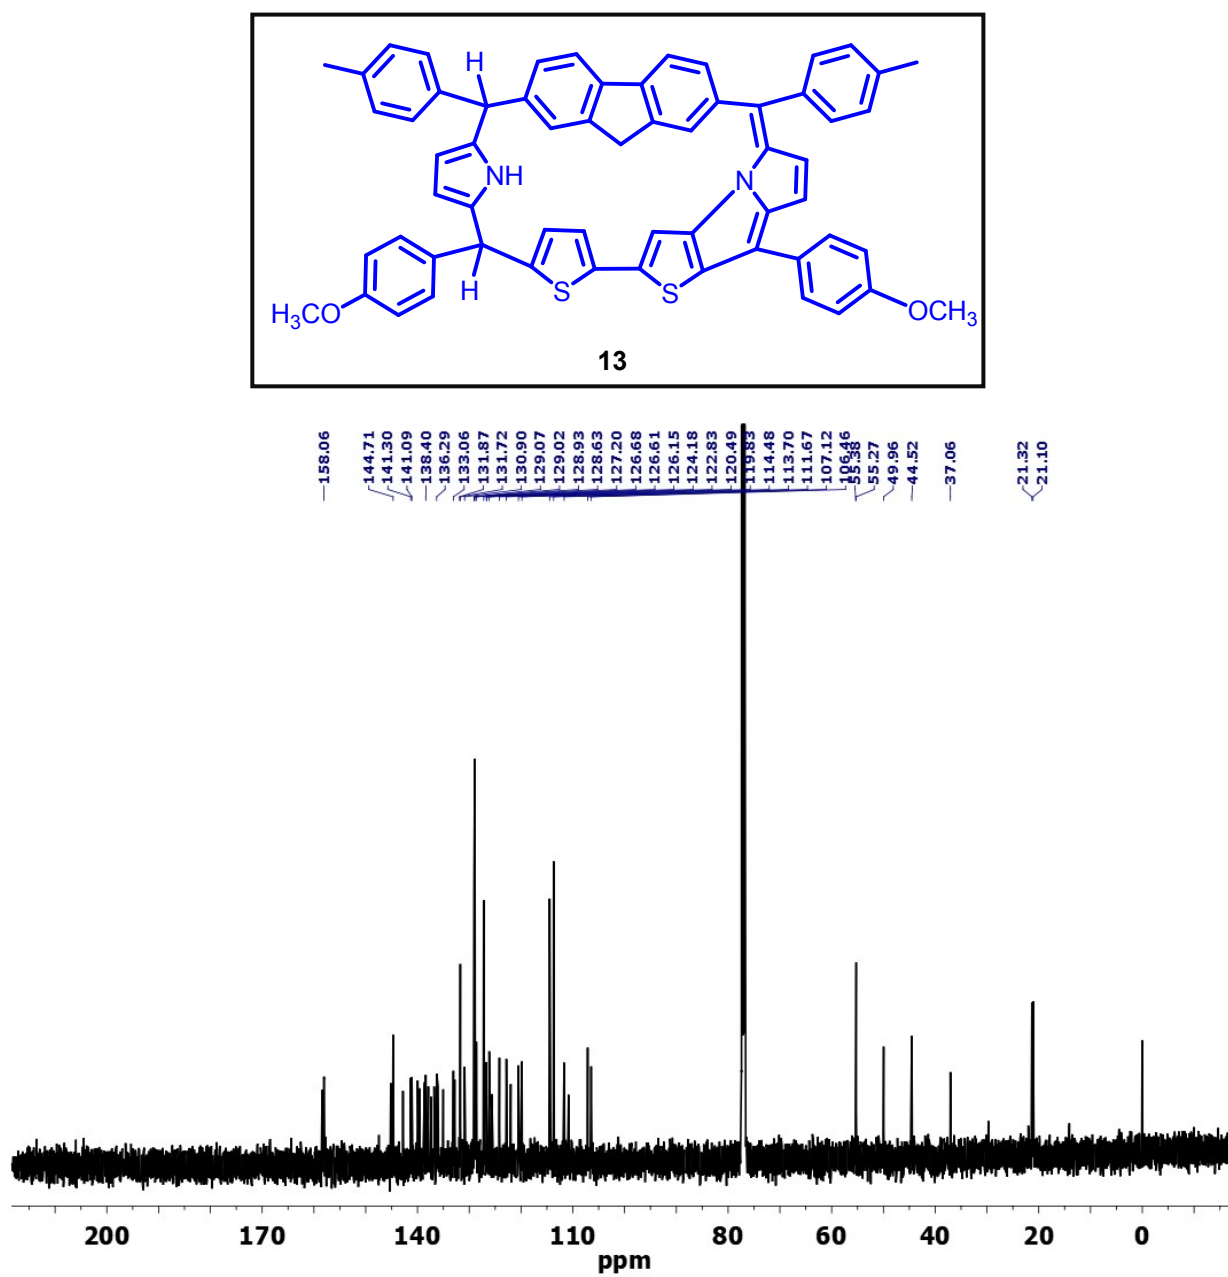

Figure S24.  $^{13}\text{C}$  NMR of compound **13** recorded in  $\text{CDCl}_3$ .

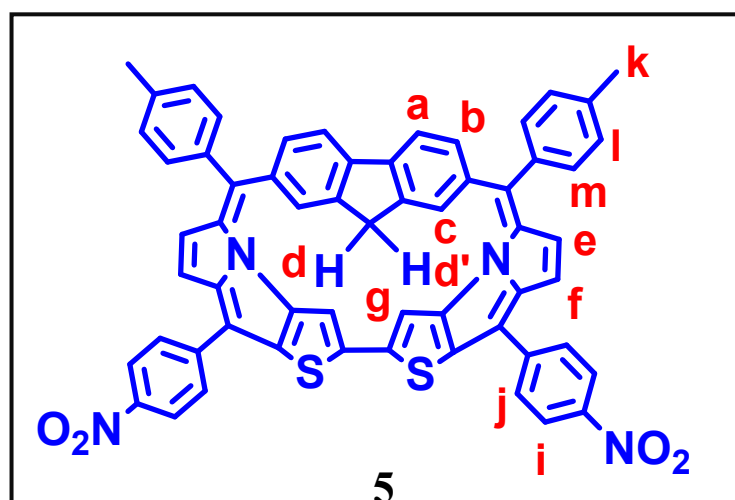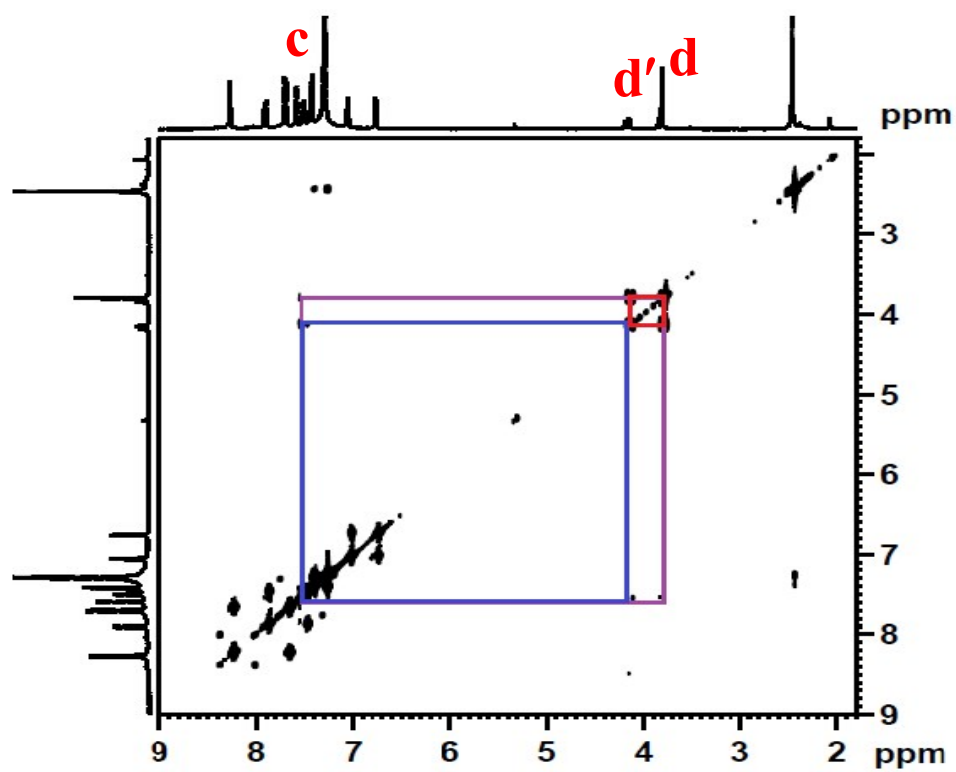

Figure S25. <sup>1</sup>H-<sup>1</sup>H NOESY spectrum of compound **5** recorded in CDCl<sub>3</sub>.

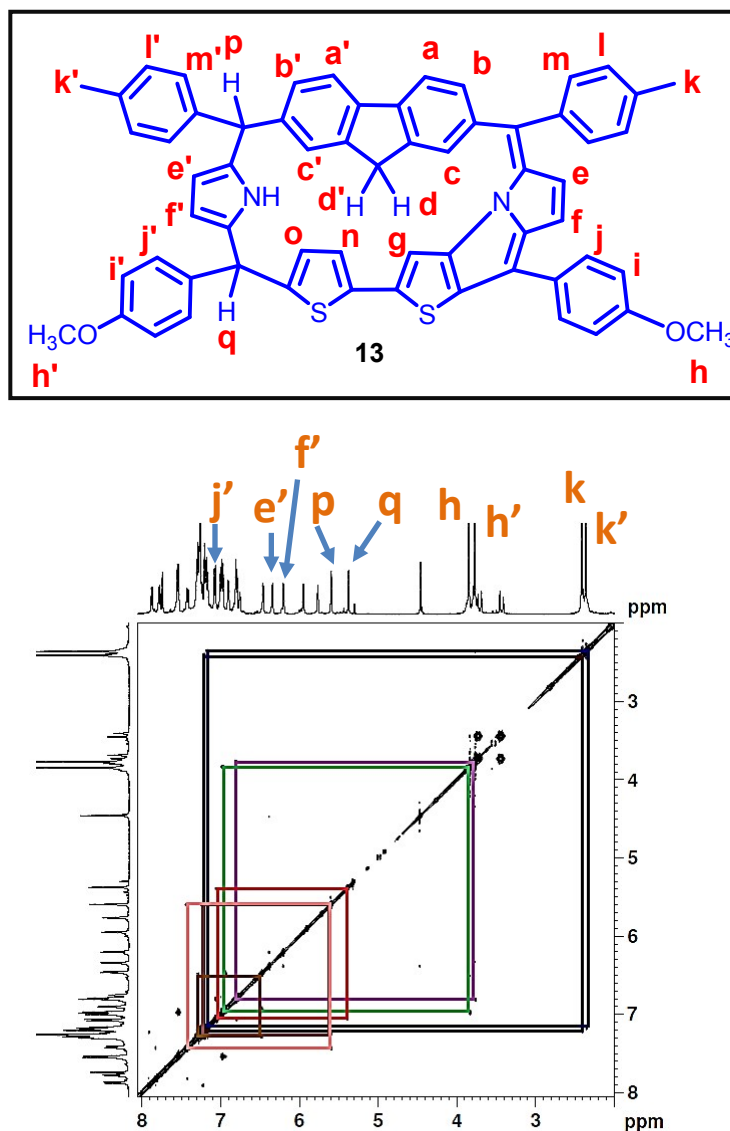

**Figure S26.**  $^1\text{H}$ - $^1\text{H}$  NOESY spectrum of compound **13** recorded in  $\text{CDCl}_3$ .

In  $^1\text{H}$  NMR spectra of intermediate **13**, two singlets appeared for  $-\text{OCH}_3$  protons (*type h & h'*) at 3.84 and 3.77 ppm corresponding to three protons each. The *h'* type protons showed NOE correlation with a resonance appeared at 6.80 ppm (*type i'*) which in turn showed cross peak correlation with a resonance at 7.08 ppm (*type j*). The *type j'* proton showed NOE correlation with a resonance at 6.19 ppm (*type f*) which in turn showed correlation with 6.34 ppm assigned as *type e'*. In addition to that two singlets were observed at 5.37 and 5.59 ppm assigned as *meso*  $\text{sp}^3$  protons (*q* and *p* type) protons based on  $^{13}\text{C}$  and HSQC NMR studies. The *q* type proton

showed a NOE correlation with one of the  $-\text{OCH}_3$  aryl proton at 7.08 ppm assigned as  $j'$  type proton which in turn showed correlation with a resonance at 6.19 ppm as  $f'$  type proton. This indicated that the  $q$  type proton is located near the bithiophene moiety of the fused macrocycle. Similarly the  $p$  type proton showed one NOE correlation with one of the  $-\text{CH}_3$  aryl proton at 7.28 ppm assigned as  $m'$  type proton which in turn showed correlation with a resonance at 7.18 ppm assigned as type  $l'$  proton and another correlation with one of the aryl protons (type  $b'$ ) of fluorene moiety which indicated that  $p$  type proton is located near the fluorene moiety of the fused macrocycle. All these NMR characteristics concluded that both the meso  $\text{sp}^3$  protons (type  $p$  and  $q$ ) are on the same side of the fused macrocycle. In addition to that, the singlet resonance observed in the region of 4.46 ppm was due to one proton of bithiophene moiety and assigned as type  $g$  protons. The two protons of  $-\text{CH}_2$  group of fluorene moiety appeared as two doublets at 3.72 ppm (type  $d$ ) and 3.411 ppm (type  $d'$ ). All other mono fused calixsapphyrin intermediates having different meso-aryl substituents such as macrocycles **11**, **12** and **13** showed similar NMR features and the resonances of each of these mono fused calixsapphyrin intermediates were identified and assigned by adopting similar strategy as described for macrocycle **13**. Thus, 1D and 2D NMR spectroscopy was very useful in deducing the molecular structures of these mono fused calixsapphyrin intermediates **11-13**.

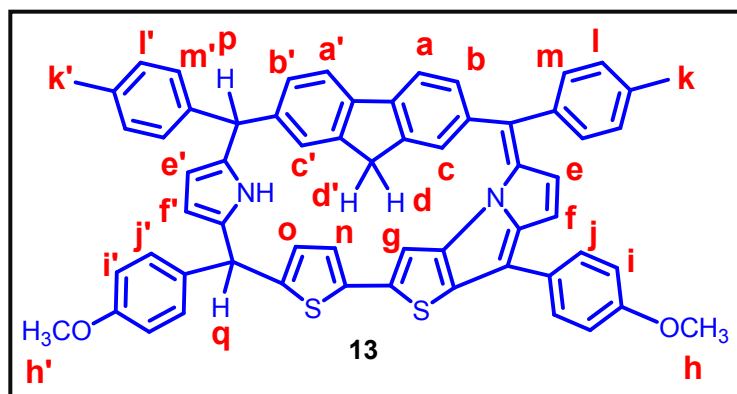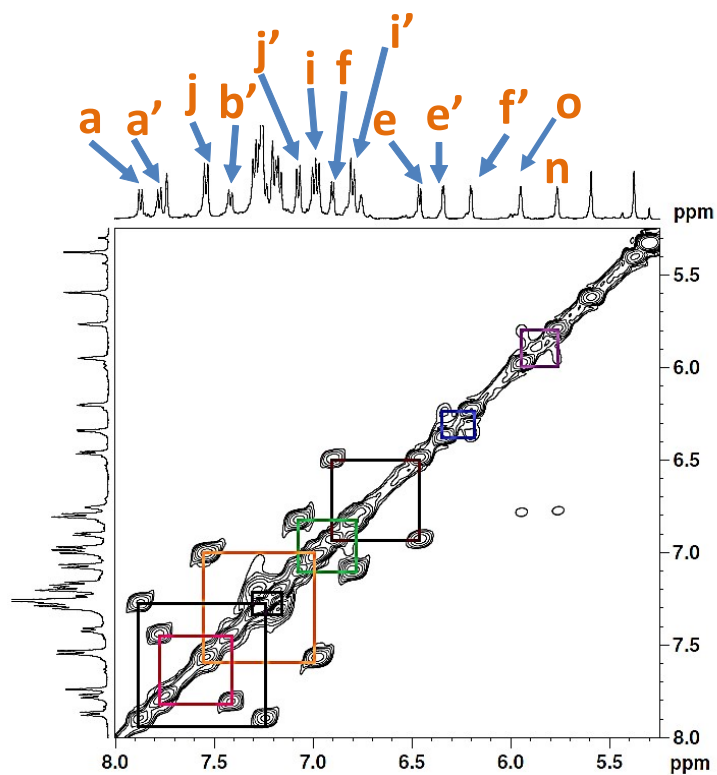

**Figure S27.** <sup>1</sup>H-<sup>1</sup>H COSY spectrum of compound **13** recorded in CDCl<sub>3</sub>.

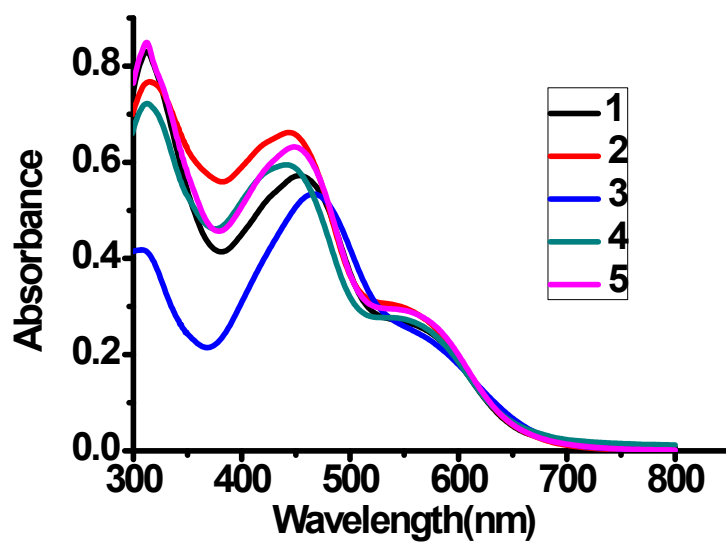

**Figure S28.** Comparison of absorption spectra of compounds **1-5** recorded in  $\text{CHCl}_3$ .

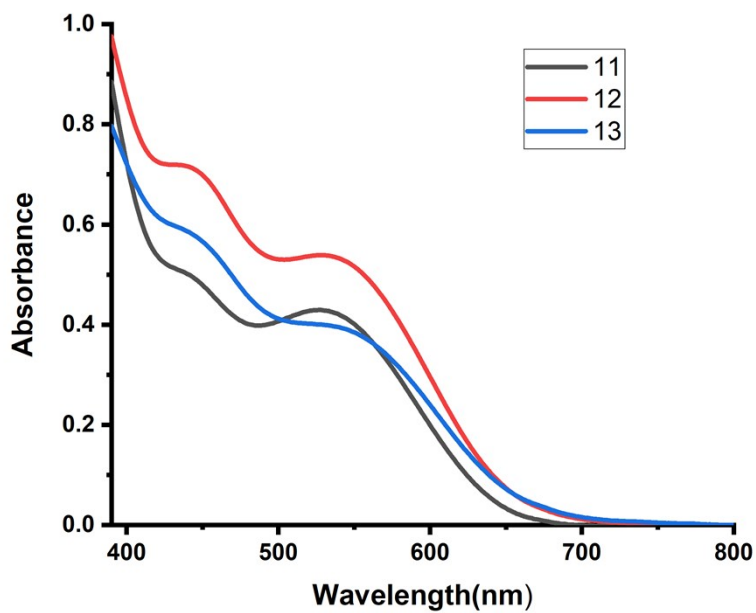

**Figure S29.** Comparison of absorption spectra of compounds **11-13** recorded in  $\text{CHCl}_3$ .

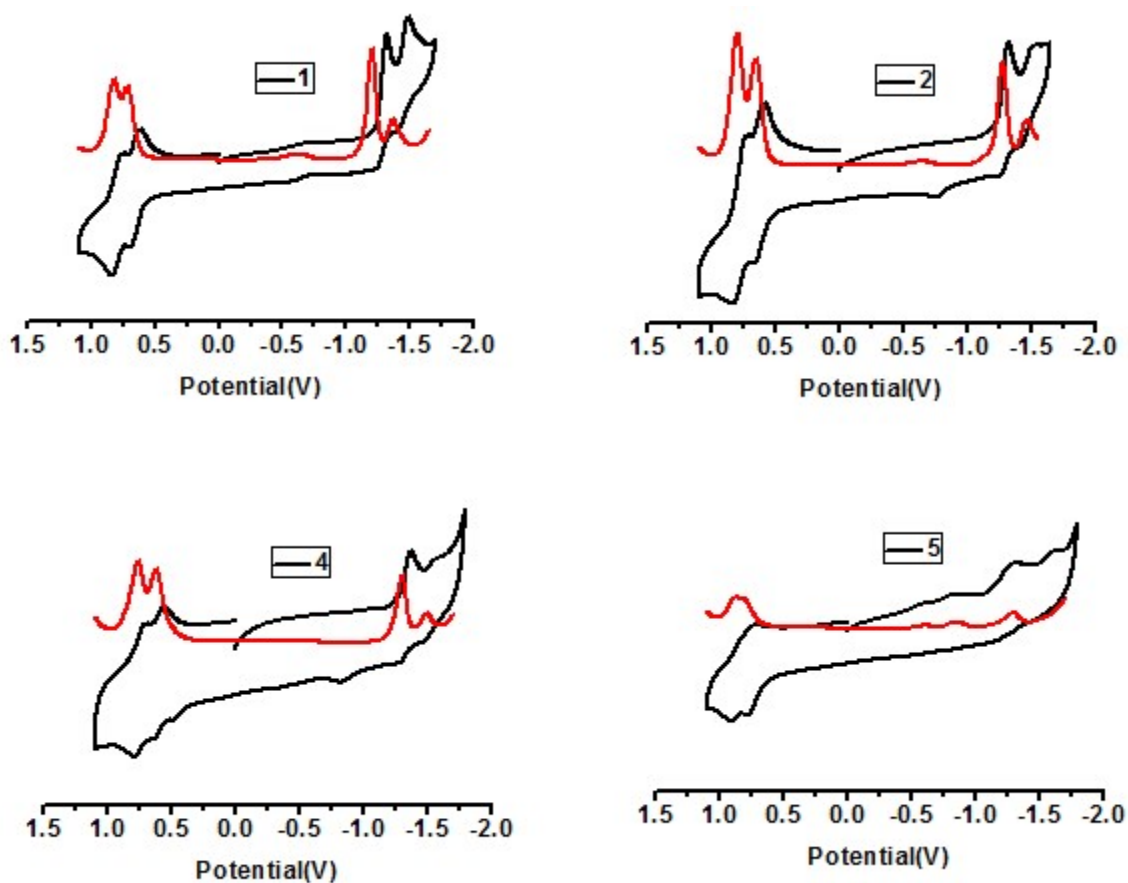

**Figure S30.** Cyclic voltammograms (black lines) along with differential pulse voltammograms (red lines) of the compounds **1**, **2**, **4** and **5** recorded in  $\text{CH}_2\text{Cl}_2$  containing 0.1 M TBAP as the supporting electrolyte and a saturated calomel electrode (SCE) as the reference electrode at scan rates of  $50 \text{ mVs}^{-1}$ .

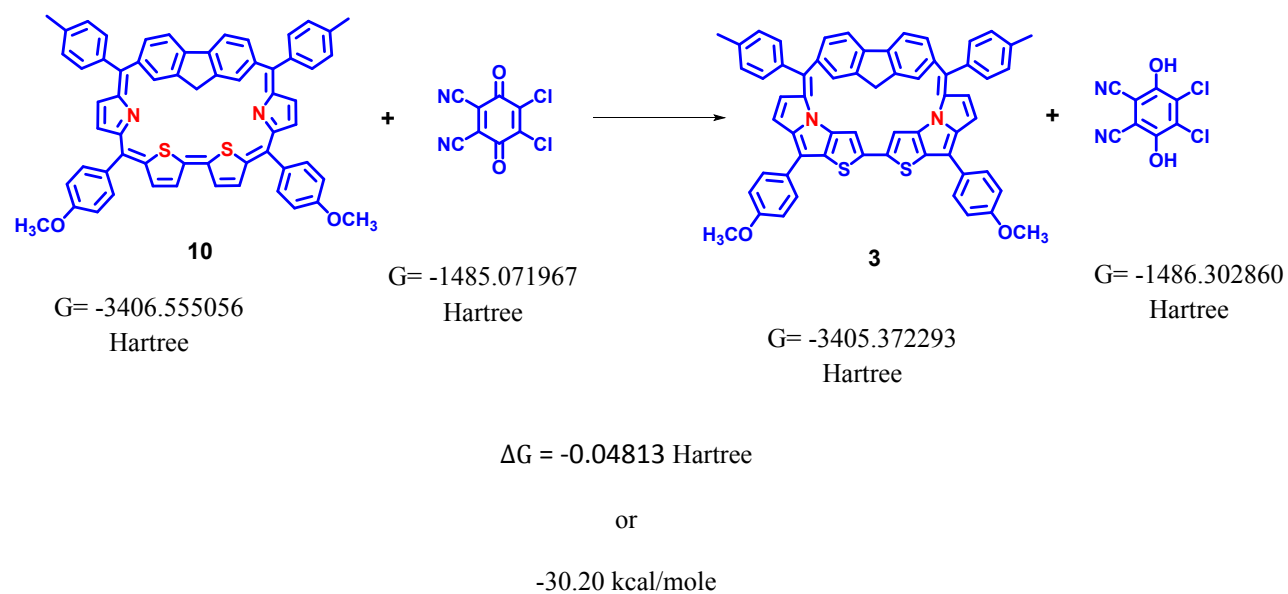

**Figure S31:** Calculation for the stability of compound **3** over compound **10**.

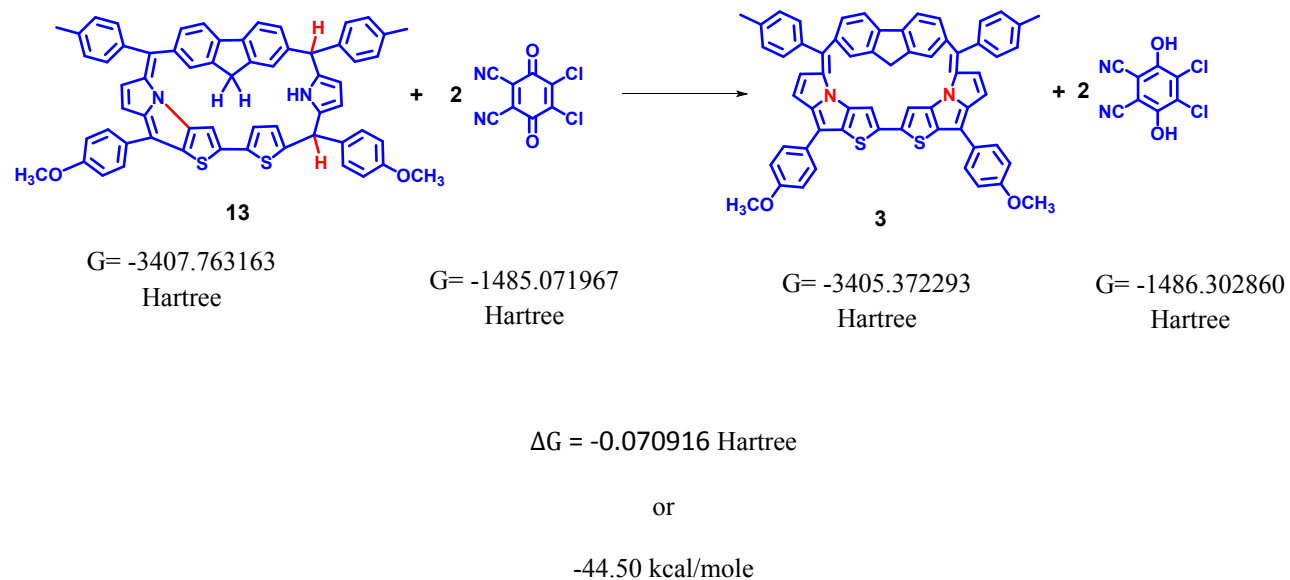

**Figure S32:** Calculation for the stability of compound **3** over compound **13**.



**Figure S33:** Cartesian coordinates of the S0 optimized structures of the compounds **10**.

# Sum of imaginary frequencies= 0; # Total Energy (hartree) = -3406.402378.

| Atoms | X           | Y           | Z           | Atoms | X           | Y           | Z           |
|-------|-------------|-------------|-------------|-------|-------------|-------------|-------------|
| C     | 1.15758400  | -2.62049300 | 0.84615200  | C     | -8.94473700 | -6.80701600 | -0.34067100 |
| C     | 0.71269300  | -3.70911700 | 0.05814900  | C     | 8.91683000  | -6.80240200 | -0.31266300 |
| C     | -0.74152100 | -3.71003900 | 0.05293700  | H     | -0.02523000 | -2.00211600 | 2.56033600  |
| C     | -1.19336700 | -2.62098900 | 0.83645800  | H     | -0.01982000 | -0.83342600 | 1.24674900  |
| C     | -0.02063800 | -1.90741600 | 1.46553200  | H     | -1.34119900 | -5.36131500 | -1.22055600 |
| C     | -1.66824600 | -4.51685600 | -0.62065400 | H     | -3.73644800 | -4.78819000 | -1.10164400 |
| C     | -3.01619100 | -4.19469300 | -0.54926700 | H     | -2.86864100 | -1.43862600 | 1.46421200  |
| C     | -3.47043700 | -3.05794800 | 0.16697400  | H     | 2.82690800  | -1.43951200 | 1.49119200  |
| C     | -2.52985800 | -2.29366600 | 0.89493500  | H     | 3.71707300  | -4.78187900 | -1.07660600 |
| C     | 2.49339100  | -2.29318700 | 0.91692200  | H     | 1.32366100  | -5.35718200 | -1.21412100 |
| C     | 3.44066300  | -3.05532700 | 0.19505200  | H     | -7.48043900 | -1.40814800 | 0.52735200  |
| C     | 2.99237800  | -4.19020900 | -0.52813400 | H     | -7.31419800 | 1.26232300  | 0.44958900  |
| C     | 1.64534700  | -4.51361100 | -0.61008300 | H     | -3.53087700 | 4.69872900  | -0.60571500 |
| C     | 4.84250000  | -2.65112600 | 0.15336300  | H     | -1.01335900 | 5.02730600  | -0.71233200 |
| C     | -4.87168000 | -2.65299900 | 0.10931700  | H     | 6.51400000  | 2.76595500  | -1.79384300 |
| C     | -5.90607900 | -3.70519200 | -0.01948200 | H     | 8.19146700  | 4.55869700  | -1.74394900 |
| C     | -5.24422400 | -1.31029900 | 0.14519200  | H     | 6.60852900  | 5.93529500  | 2.00906100  |
| C     | 5.87763300  | -3.70238200 | 0.02220100  | H     | 4.91131500  | 4.11907300  | 1.94795900  |
| C     | 5.21709300  | -1.30938900 | 0.20895500  | H     | 5.01339800  | -4.98593600 | 1.52464600  |
| C     | -6.60319100 | -0.80585000 | 0.34085500  | H     | 6.73153900  | -6.73925900 | 1.33131100  |
| C     | -6.51705100 | 0.54626400  | 0.31248000  | H     | 8.69554400  | -4.47786000 | -1.74413000 |
| C     | -5.10381000 | 0.86036000  | 0.07719200  | H     | 6.97714700  | -2.72176100 | -1.55005900 |
| N     | -4.36214500 | -0.24798400 | 0.00208300  | H     | -5.05298400 | -4.97216000 | 1.50321300  |
| N     | 4.33980600  | -0.24331400 | 0.06788400  | H     | -6.77073300 | -6.72685600 | 1.31747600  |
| C     | 5.08148400  | 0.86265200  | 0.17536300  | H     | -8.71094400 | -4.49976900 | -1.79789200 |
| C     | -3.25549400 | 2.55578200  | -0.21164300 | H     | -6.99323700 | -2.74250700 | -1.61151300 |
| C     | -2.82033600 | 3.89587900  | -0.46631900 | H     | -6.46108000 | 2.71064500  | -1.99467000 |
| C     | -1.47087300 | 4.06529400  | -0.52561400 | H     | -8.16499400 | 4.52099600  | -2.02517600 |
| C     | -0.70509500 | 2.87513700  | -0.32581900 | H     | -6.70832800 | 5.93582400  | 1.76434100  |
| S     | -1.81754500 | 1.49885800  | -0.10477000 | H     | -5.02380600 | 4.14720600  | 1.78293600  |
| C     | 0.69097100  | 2.87628600  | -0.30641200 | H     | -9.72153800 | -6.66043900 | 0.42043400  |
| C     | 3.23785400  | 2.55953500  | -0.12741900 | H     | -8.52576600 | -7.80602300 | -0.18486900 |
| S     | 1.79977300  | 1.49921500  | -0.07179200 | H     | -9.43832800 | -6.79394700 | -1.31653800 |
| C     | 4.57186700  | 2.19831300  | 0.03643300  | H     | 8.49499600  | -7.80306300 | -0.17631200 |
| C     | -4.59197100 | 2.19395500  | -0.07523500 | H     | 9.68588000  | -6.66852800 | 0.45857500  |
| C     | 5.58275300  | 3.30619500  | 0.06715800  | H     | 9.42042600  | -6.77539400 | -1.28311700 |
| C     | -5.60925300 | 3.29641300  | -0.10200500 | C     | -8.66022400 | 7.25143400  | 0.77917200  |
| C     | 6.52671900  | 3.45600200  | -0.95545700 | H     | -7.74968300 | 7.85282400  | 0.89728200  |
| C     | 7.48257900  | 4.47501800  | -0.92875400 | H     | -8.90192200 | 6.77632600  | 1.73856200  |
| C     | 7.50701500  | 5.37243400  | 0.14494900  | H     | -9.48406100 | 7.90292900  | 0.48441000  |
| C     | 6.57084100  | 5.23585700  | 1.18039100  | C     | 9.36687100  | 6.58644300  | -0.73633400 |
| C     | 5.62672100  | 4.21881400  | 1.13716200  | H     | 8.90517000  | 6.79326800  | -1.71032200 |
| C     | 5.82233000  | -4.86848300 | 0.81059900  | H     | 10.02342500 | 5.71201500  | -0.83019300 |
| C     | 6.79449000  | -5.85642800 | 0.69975500  | H     | 9.96064900  | 7.44918800  | -0.43112300 |
| C     | 7.85384600  | -5.73552100 | -0.21178300 | O     | 8.39181800  | 6.40332700  | 0.27815800  |
| C     | 7.89910100  | -4.58748100 | -1.01225700 | O     | -8.52583700 | 6.29501800  | -0.26031900 |
| C     | 6.93425100  | -3.58895100 | -0.89965900 | C     | 1.45946400  | 4.06994300  | -0.47079800 |
| C     | -5.85678100 | -4.86249800 | 0.78215200  | H     | 1.00527200  | 5.03410700  | -0.65427600 |
| C     | -6.82865000 | -5.85119500 | 0.67554800  | C     | 2.80715300  | 3.90214000  | -0.37548300 |
| C     | -7.88141400 | -5.74003500 | -0.24479300 | H     | 3.51923800  | 4.70844600  | -0.48367200 |
| C     | -7.92001700 | -4.60135400 | -1.05892800 | C     | 6.48976200  | 0.54177900  | 0.43006700  |
| C     | -6.95555300 | -3.60201100 | -0.95070800 | C     | 6.57356600  | -0.81088900 | 0.43465200  |
| C     | -6.51496900 | 3.41716600  | -1.17195500 | H     | 7.28507200  | 1.25377800  | 0.59565800  |
| C     | -7.47039400 | 4.42398700  | -1.19726000 | H     | 7.44639300  | -1.41815800 | 0.62592800  |
| C     | -7.55234600 | 5.34539100  | -0.14254000 |       |             |             |             |
| C     | -6.66335800 | 5.24231600  | 0.93311900  |       |             |             |             |
| C     | -5.70576400 | 4.22431200  | 0.94126000  |       |             |             |             |

**Figure S34:** Cartesian coordinates of the S0 optimized structures of the compounds **3**. # Sum of imaginary frequencies= 0; # Total Energy (hartree) = -3405.225927.

| Atoms | X           | Y           | Z           | Atoms | X           | Y           | Z           |
|-------|-------------|-------------|-------------|-------|-------------|-------------|-------------|
| C     | 0.86733900  | -3.50687000 | -0.89037900 | C     | -7.02256400 | 4.13728200  | -2.79788600 |
| C     | -0.56992800 | -3.59407300 | -0.63904600 | C     | -6.39500500 | 5.37266900  | -2.59976300 |
| C     | -0.79197200 | -3.51066300 | 0.75390500  | C     | -5.16423000 | 5.41855000  | -1.92866000 |
| C     | 0.53735900  | -3.46553800 | 1.48426600  | C     | -4.57850900 | 4.25297600  | -1.45948300 |
| C     | -1.63899500 | -3.51253600 | -1.53305200 | C     | -7.36000900 | -6.05422400 | 4.52969700  |
| C     | -2.90575800 | -3.23194200 | -1.03166400 | C     | 9.04842000  | -5.18744600 | -3.46507200 |
| C     | -3.12968900 | -3.07857800 | 0.35019600  | H     | 0.72500000  | -4.38645600 | 2.05448300  |
| C     | -2.06959300 | -3.30021300 | 1.25151500  | H     | 0.59038200  | -2.63656300 | 2.19896600  |
| C     | 2.83919300  | -2.87369100 | 0.37247000  | H     | -1.47900500 | -3.58273300 | -2.60495200 |
| C     | 3.52505200  | -2.65643700 | -0.83813700 | H     | -3.73700400 | -3.08426300 | -1.71358500 |
| C     | 2.90088200  | -2.99056500 | -2.05642200 | H     | -2.24287100 | -3.18565200 | 2.31795000  |
| C     | 1.57177800  | -3.39920300 | -2.09348300 | H     | 3.33196200  | -2.64313600 | 1.31262900  |
| C     | 4.87840000  | -2.05786900 | -0.83603700 | H     | 3.45270800  | -2.85673300 | -2.98148600 |
| C     | -4.45651600 | -2.61305800 | 0.81800900  | H     | 1.07956200  | -3.57026000 | -3.04648700 |
| C     | -5.20365500 | -3.46994700 | 1.76039200  | H     | -7.18253800 | -1.67786900 | 0.68472800  |
| C     | -4.98448300 | -1.43252600 | 0.34880200  | H     | -7.45430200 | 0.66352300  | -0.53884500 |
| C     | 5.95730500  | -2.83309100 | -1.49237000 | H     | 7.14567800  | 1.43657300  | 1.19512200  |
| C     | 5.14334800  | -0.84429200 | -0.24953100 | H     | 7.36608400  | -0.92418500 | -0.00252600 |
| C     | -6.38906400 | -1.04187100 | 0.32233200  | H     | -1.33726500 | -1.05704300 | 0.32730200  |
| C     | -6.52860300 | 0.14496100  | -0.33314100 | H     | 1.47641000  | -0.82949000 | -0.89734500 |
| C     | -5.22506000 | 0.60587100  | -0.71207900 | H     | 2.63011100  | 3.79974200  | 2.79640100  |
| N     | -4.30045800 | -0.36871600 | -0.31168400 | H     | 3.24803200  | 5.96613200  | 3.81986700  |
| N     | 4.23811900  | 0.16957800  | 0.18155300  | H     | 7.06755100  | 5.79833400  | 1.85540200  |
| C     | 4.96298900  | 1.22282900  | 0.76019400  | H     | 6.43430100  | 3.68466700  | 0.79876300  |
| C     | 6.34820300  | 0.85696400  | 0.75204500  | H     | 5.26717800  | -4.73549000 | -0.74438400 |
| C     | 6.46433800  | -0.34606400 | 0.12804900  | H     | 7.03147200  | -6.05799600 | -1.83321300 |
| C     | -3.19167400 | 1.49057100  | -0.92408000 | H     | 8.66415100  | -2.47628700 | -3.54517400 |
| C     | -3.02099300 | 0.19577700  | -0.41157900 | H     | 6.89356400  | -1.15174800 | -2.46578900 |
| C     | -1.67308800 | -0.13839200 | -0.12585000 | H     | -4.48466900 | -5.31887500 | 0.91064900  |
| C     | -0.80541000 | 0.90099900  | -0.41081900 | H     | -5.69419800 | -6.77382100 | 2.48051900  |
| S     | -1.66199600 | 2.30132300  | -1.09399000 | H     | -7.27935200 | -3.31637500 | 4.46942100  |
| C     | 0.61943000  | 1.00238300  | -0.13427700 | H     | -6.05303100 | -1.85748500 | 2.91531800  |
| C     | 1.63962300  | 0.09283000  | -0.36103600 | H     | -6.89739400 | 2.01764300  | -2.52417700 |
| C     | 2.88882000  | 0.55832900  | 0.13335300  | H     | -7.96523100 | 4.06787700  | -3.32777700 |
| C     | 2.82459700  | 1.83031900  | 0.72261700  | H     | -4.68997000 | 6.38324000  | -1.78139800 |
| S     | 1.21002800  | 2.46501200  | 0.68605900  | H     | -3.63848000 | 4.31694000  | -0.92050100 |
| C     | 4.12185200  | 2.27894800  | 1.11255300  | H     | -6.78351600 | -6.94805800 | 4.78820100  |
| C     | -4.57488500 | 1.76907900  | -1.14000100 | H     | -8.30090700 | -6.39636500 | 4.08019700  |
| C     | 4.49167900  | 3.55801000  | 1.72235600  | H     | -7.61326600 | -5.53397700 | 5.45789200  |
| C     | -5.19340000 | 2.99673800  | -1.64154600 | H     | 9.37258700  | -6.03124100 | -2.84784300 |
| C     | 3.59727000  | 4.23970000  | 2.57353000  | H     | 9.92895000  | -4.58411000 | -3.70386200 |
| C     | 3.93756400  | 5.44849700  | 3.16121600  | H     | 8.67234400  | -5.60369100 | -4.40823700 |
| C     | 5.19366100  | 6.02370700  | 2.92045800  | C     | -8.13127800 | 6.58670900  | -3.70353000 |
| C     | 6.09683400  | 5.36960000  | 2.07449800  | H     | -8.94219900 | 6.19226600  | -3.07758700 |
| C     | 5.73857900  | 4.15735500  | 1.48447100  | H     | -8.08770600 | 6.01018500  | -4.63663200 |
| C     | 6.01083500  | -4.23425500 | -1.35598300 | H     | -8.33635300 | 7.63220700  | -3.93829200 |
| C     | 7.00915600  | -4.97982300 | -1.97290100 | O     | -6.88836000 | 6.57455700  | -3.02081400 |
| C     | 7.98924800  | -4.36828200 | -2.76827200 | C     | 6.68744400  | 7.84125700  | 3.33611500  |
| C     | 7.92842700  | -2.97763400 | -2.92097100 | H     | 6.84169900  | 8.09404900  | 2.27914000  |
| C     | -5.10247000 | -4.87380000 | 1.68419500  | H     | 7.51961500  | 7.21223000  | 3.67794400  |
| C     | -5.78800500 | -5.69438500 | 2.57279600  | H     | 6.66766200  | 8.75982100  | 3.92437400  |
| C     | -6.59804500 | -5.15782600 | 3.58415400  | O     | 5.43362300  | 7.21304300  | 3.54764900  |
| C     | -6.68259400 | -3.76280100 | 3.67771000  |       |             |             |             |
| C     | -5.99855600 | -2.93411600 | 2.79247100  |       |             |             |             |
| C     | -6.41838500 | 2.97161600  | -2.32673700 |       |             |             |             |

**Figure S35:** Cartesian coordinates of the S0 optimized structure of the compound *type a*.

# Sum of imaginary frequencies= 0; # Total Energy (hartree) = -3407.611859.

| Atoms | X           | Y           | Z           | Atoms | X           | Y           | Z           |
|-------|-------------|-------------|-------------|-------|-------------|-------------|-------------|
| C     | -0.21887900 | -3.55860400 | -0.20402500 | C     | -1.93470400 | -0.14996600 | -0.66724900 |
| C     | 0.17674000  | -2.87989500 | 0.96983800  | C     | -3.27046000 | 0.00858700  | -0.22611400 |
| C     | 1.62812600  | -2.68914500 | 0.93611900  | C     | -3.68386600 | 1.34108900  | -0.09712200 |
| C     | 2.12731800  | -3.24193600 | -0.25847200 | S     | -2.38060700 | 2.43159100  | -0.48412800 |
| C     | 1.00521100  | -3.91106600 | -1.02897000 | C     | -5.05305600 | 1.40091400  | 0.31491000  |
| C     | 2.47613900  | -1.98167400 | 1.79336000  | C     | 3.82018900  | 2.59111400  | -1.75615700 |
| C     | 3.79703900  | -1.77149900 | 1.41046100  | C     | -5.88581700 | 2.58189200  | 0.54227200  |
| C     | 4.29824900  | -2.27697800 | 0.19653500  | C     | 3.84517700  | 4.02385600  | -1.23256000 |
| C     | 3.45624100  | -3.04538100 | -0.62127000 | C     | -5.63557700 | 3.79460000  | -0.13311300 |
| C     | -1.56364000 | -3.73791400 | -0.49719900 | C     | -6.42434400 | 4.91503400  | 0.07783200  |
| C     | -2.54192200 | -3.19912800 | 0.36502300  | C     | -7.50096900 | 4.86484100  | 0.97531300  |
| C     | -2.12965500 | -2.57756800 | 1.56097500  | C     | -7.76683500 | 3.67413800  | 1.66164500  |
| C     | -0.78292600 | -2.42119600 | 1.87382900  | C     | -6.96074100 | 2.55666100  | 1.44505800  |
| C     | -3.98663900 | -3.26181900 | 0.03617600  | C     | -5.57065100 | -4.70990500 | -1.28916700 |
| C     | 5.67155500  | -1.84206200 | -0.31631500 | C     | -6.10817100 | -5.95512200 | -1.60362500 |
| C     | 6.88591400  | -2.38707600 | 0.44004000  | C     | -5.66254800 | -7.12187100 | -0.96952600 |
| C     | 5.68273900  | -0.32684700 | -0.43256900 | C     | -4.65362000 | -6.99352200 | -0.00380100 |
| C     | -4.56827900 | -4.57588000 | -0.30908000 | C     | -4.11216300 | -5.75340500 | 0.31632700  |
| C     | -4.78058100 | -2.13967800 | 0.10565200  | C     | 6.79216800  | -3.12050500 | 1.62461400  |
| C     | 6.54098800  | 0.66254700  | 0.00603500  | C     | 7.93626300  | -3.62503200 | 2.24921800  |
| C     | 5.98845800  | 1.91982500  | -0.38109400 | C     | 9.20981700  | -3.41820200 | 1.71401700  |
| C     | 4.79778600  | 1.67323100  | -1.03831600 | C     | 9.30112800  | -2.69242300 | 0.51693800  |
| N     | -4.35169400 | -0.78639100 | 0.14988000  | C     | 8.16407900  | -2.19034100 | -0.10769100 |
| C     | -5.43563400 | 0.05721600  | 0.41553900  | C     | 3.83871000  | 4.31856700  | 0.13382300  |
| C     | -6.59927500 | -0.77733500 | 0.52768800  | C     | 3.80641800  | 5.63700900  | 0.59635700  |
| C     | -6.22442300 | -2.07060500 | 0.30974500  | C     | 3.78414800  | 6.69329600  | -0.32054400 |
| C     | 2.41519300  | 1.99938000  | -1.80420600 | C     | 3.79606200  | 6.41370800  | -1.69445100 |
| C     | 0.60510000  | 0.66390900  | -2.47243800 | C     | 3.82398400  | 5.09765600  | -2.13518000 |
| C     | 0.03111800  | 1.27326700  | -1.38018800 | C     | 10.44838800 | -3.94567000 | 2.39876400  |
| S     | 1.17707900  | 2.37417800  | -0.62803700 | C     | -6.22004200 | -8.47506600 | -1.33885200 |
| C     | -1.31237300 | 1.06611400  | -0.86169400 | H     | 1.14982200  | -4.99828300 | -1.09732700 |

| Atoms | X           | Y           | Z           |
|-------|-------------|-------------|-------------|
| H     | 0.93103300  | -3.54284900 | -2.05972000 |
| H     | 2.10167100  | -1.55011400 | 2.71714900  |
| H     | 4.44379000  | -1.15488100 | 2.02746200  |
| H     | 3.83511600  | -3.43656400 | -1.56340400 |
| H     | -1.87460600 | -4.23466000 | -1.41212800 |
| H     | -2.88678800 | -2.19240100 | 2.23607400  |
| H     | -0.49180900 | -1.91411400 | 2.78901900  |
| H     | 7.46318500  | 0.50190400  | 0.54483000  |
| H     | 6.41812200  | 2.89475900  | -0.20297900 |
| H     | -7.59639600 | -0.42624200 | 0.75300000  |
| H     | -6.85149600 | -2.94605300 | 0.38625500  |
| H     | 0.05930100  | -0.02552900 | -3.10616700 |
| H     | -1.42714600 | -1.08958600 | -0.82546200 |
| H     | -4.82430100 | 3.85020000  | -0.85232900 |
| H     | -6.23124100 | 5.84417900  | -0.44815500 |
| H     | -8.58137800 | 3.60938000  | 2.37330000  |
| H     | -7.15485600 | 1.65336200  | 2.01498100  |
| H     | -5.91285000 | -3.82783500 | -1.82058700 |
| H     | -6.87851600 | -6.02350500 | -2.36794900 |
| H     | -4.29014100 | -7.88089300 | 0.50894200  |
| H     | -3.33763400 | -5.68530900 | 1.07362000  |
| H     | 5.82053200  | -3.31660100 | 2.06416400  |
| H     | 7.82973100  | -4.19486900 | 3.16918500  |
| H     | 10.27623200 | -2.52415400 | 0.06551600  |
| H     | 8.26483100  | -1.63439200 | -1.03588400 |
| H     | 3.87613600  | 3.50908500  | 0.85562600  |
| H     | 3.80336300  | 5.82303200  | 1.66362700  |
| H     | 3.78425600  | 7.24327600  | -2.39360000 |
| H     | 3.82809900  | 4.89769000  | -3.20381000 |
| H     | 10.19616800 | -4.67346100 | 3.17509400  |
| H     | 11.01489800 | -3.13699000 | 2.87674600  |
| H     | 11.12365100 | -4.43259900 | 1.68706000  |
| H     | -7.23583300 | -8.39510200 | -1.73685300 |
| H     | -6.24589000 | -9.14663500 | -0.47517100 |

| Atoms | X            | Y           | Z           |
|-------|--------------|-------------|-------------|
| H     | -5.60647100  | -8.96123600 | -2.10800000 |
| C     | 3.73188500   | 8.35648100  | 1.39322100  |
| H     | 4.62823400   | 7.99854000  | 1.91596300  |
| H     | 2.84180000   | 7.95447400  | 1.89386600  |
| H     | 3.70476900   | 9.44634400  | 1.43411700  |
| O     | 3.75701700   | 8.01648600  | 0.01605700  |
| C     | -9.31712000  | 6.02584000  | 2.00579400  |
| H     | -9.00270300  | 5.82041400  | 3.03722600  |
| H     | -10.08225900 | 5.29507600  | 1.71339000  |
| H     | -9.74228900  | 7.02924800  | 1.95456500  |
| O     | -8.21695400  | 6.01994000  | 1.11085900  |
| C     | 1.94689700   | 1.07703000  | -2.70948100 |
| H     | 2.54397000   | 0.72416100  | -3.54491900 |
| N     | 4.64100000   | 0.30634700  | -1.07815800 |
| H     | 3.79410100   | -0.14856300 | -1.38723400 |
| H     | 5.75460200   | -2.24601100 | -1.33735700 |
| H     | 4.13209100   | 2.63997700  | -2.81037700 |

**Figure S36:** Cartesian coordinates of the S0 optimized structure of the compound *type b*.

# Sum of imaginary frequencies= 0; # Total Energy (hartree) = -3407.597856.

| Atoms | X           | Y           | Z           | Atoms | X           | Y           | Z           |
|-------|-------------|-------------|-------------|-------|-------------|-------------|-------------|
| C     | -1.39250200 | -3.32515400 | -0.08147400 | C     | -0.86536800 | 0.55142200  | -2.36422000 |
| C     | -0.71963000 | -2.79966300 | 1.04166500  | C     | -2.27613200 | 0.60901200  | -2.25374100 |
| C     | 0.71518000  | -2.72801300 | 0.73756600  | C     | -2.74219700 | 1.62031900  | -1.43629700 |
| C     | 0.91885400  | -3.20519500 | -0.57473000 | S     | -1.37587500 | 2.52649100  | -0.78316700 |
| C     | -0.38978000 | -3.70790000 | -1.15276600 | C     | -4.13008300 | 1.89516600  | -1.04317100 |
| C     | 1.78128700  | -2.18467300 | 1.45528900  | C     | 4.97629000  | 2.69278500  | -0.51596700 |
| C     | 3.02342900  | -2.05210100 | 0.83097900  | C     | -4.66962600 | 3.26190300  | -1.17249100 |
| C     | 3.22043400  | -2.46403800 | -0.49491800 | C     | 5.13596500  | 3.50567200  | 0.76267500  |
| C     | 2.16133300  | -3.08345000 | -1.18142300 | C     | -4.31920600 | 4.07110800  | -2.27608100 |
| C     | -2.78153400 | -3.33628500 | -0.13400100 | C     | -4.81989300 | 5.35427200  | -2.42292400 |
| C     | -3.52519300 | -2.79122900 | 0.92945300  | C     | -5.69525000 | 5.88693800  | -1.46362200 |
| C     | -2.84056000 | -2.32388300 | 2.06766500  | C     | -6.04505200 | 5.11425800  | -0.35086200 |
| C     | -1.44722600 | -2.33607500 | 2.13918200  | C     | -5.52577000 | 3.82616200  | -0.21172200 |
| C     | -4.99515700 | -2.52324400 | 0.77641900  | C     | -7.23678100 | -3.65919000 | 0.52321600  |
| C     | 4.52949400  | -2.19435500 | -1.24273100 | C     | -8.15238400 | -4.63357300 | 0.90801700  |
| C     | 5.48166700  | -3.39311900 | -1.21813700 | C     | -7.85521000 | -5.56058600 | 1.91571800  |
| C     | 5.23845200  | -0.92795900 | -0.80957900 | C     | -6.59349700 | -5.47406200 | 2.51996600  |
| C     | -5.97709700 | -3.54734200 | 1.14970400  | C     | -5.67440300 | -4.50008300 | 2.14550100  |
| C     | -5.30936400 | -1.27276100 | 0.28830200  | C     | 5.70445400  | -4.13938500 | -0.05537100 |
| C     | 6.54510000  | -0.73529900 | -0.39114800 | C     | 6.59136000  | -5.21507600 | -0.05622500 |
| C     | 6.77147300  | 0.65998100  | -0.18403100 | C     | 7.28589100  | -5.58439800 | -1.21523000 |
| C     | 5.59518200  | 1.29904400  | -0.48665600 | C     | 7.05605700  | -4.83912900 | -2.37803400 |
| N     | -4.34740400 | -0.38898400 | -0.19118800 | C     | 6.17114200  | -3.76168700 | -2.37865100 |
| C     | -4.87545500 | 0.84396300  | -0.54026600 | C     | 4.68387900  | 3.02178800  | 1.99330800  |
| C     | -6.30044400 | 0.72065200  | -0.27483600 | C     | 4.82578800  | 3.76532600  | 3.16483000  |
| C     | -6.55832300 | -0.52779000 | 0.20130600  | C     | 5.43539900  | 5.02620900  | 3.11598700  |
| C     | 3.55411600  | 2.30900800  | -0.88475900 | C     | 5.89414100  | 5.52336900  | 1.88986400  |
| C     | 2.09725300  | 0.53934200  | -1.39313400 | C     | 5.74255000  | 4.76768500  | 0.73253200  |
| C     | 1.21976400  | 1.60819100  | -1.41017900 | C     | 8.26518100  | -6.73440300 | -1.20461600 |
| S     | 2.04484300  | 3.13121100  | -1.06958400 | C     | -8.83659100 | -6.64022700 | 2.30307400  |
| C     | -0.21259700 | 1.51204800  | -1.61955500 | H     | -0.36845100 | -4.79378800 | -1.32023400 |

| Atoms | X           | Y           | Z           |
|-------|-------------|-------------|-------------|
| H     | -0.62177300 | -3.24881400 | -2.12164000 |
| H     | 1.64183600  | -1.81875300 | 2.46863500  |
| H     | 3.84188800  | -1.57137200 | 1.35869600  |
| H     | 2.31004500  | -3.41475700 | -2.20726900 |
| H     | -3.30283200 | -3.69615500 | -1.01733100 |
| H     | -3.41681300 | -1.89703900 | 2.88334300  |
| H     | -0.94393300 | -1.93300500 | 3.01349700  |
| H     | 7.26867700  | -1.52668100 | -0.26260000 |
| H     | 7.68814400  | 1.12306800  | 0.15206200  |
| H     | -7.02100600 | 1.50432000  | -0.45626900 |
| H     | -7.51915100 | -0.91169800 | 0.50936400  |
| H     | 1.77617800  | -0.48386300 | -1.51940200 |
| H     | -0.33507400 | -0.16235600 | -2.98387800 |
| H     | -3.65248200 | 3.67049800  | -3.03341600 |
| H     | -4.55363800 | 5.96738800  | -3.27770100 |
| H     | -6.69564600 | 5.50827100  | 0.42098800  |
| H     | -5.76962100 | 3.25812100  | 0.68022100  |
| H     | -7.48345700 | -2.99836800 | -0.30069300 |
| H     | -9.11227400 | -4.68877200 | 0.39946000  |
| H     | -6.32703200 | -6.18208300 | 3.30144300  |
| H     | -4.70834900 | -4.46120600 | 2.63854600  |
| H     | 5.16951200  | -3.88816800 | 0.85516900  |
| H     | 6.74154800  | -5.78180300 | 0.85959900  |
| H     | 7.57283800  | -5.10692700 | -3.29649200 |
| H     | 6.01426900  | -3.19836700 | -3.29544100 |
| H     | 4.21229900  | 2.04435700  | 2.04177400  |
| H     | 4.46231000  | 3.35680400  | 4.10016200  |
| H     | 6.36468200  | 6.50072300  | 1.86836600  |
| H     | 6.10427000  | 5.16632300  | -0.21214300 |
| H     | 7.96803000  | -7.50705700 | -0.48907400 |
| H     | 9.27009600  | -6.39794300 | -0.91984400 |
| H     | 8.34703500  | -7.20030000 | -2.19118400 |
| H     | -9.86933900 | -6.32682400 | 2.12256400  |
| H     | -8.74369300 | -6.90448000 | 3.36111700  |

| Atoms | X           | Y           | Z           |
|-------|-------------|-------------|-------------|
| H     | -8.67064900 | -7.55874000 | 1.72530700  |
| C     | 5.18283900  | 5.38517500  | 5.46530900  |
| H     | 5.68878300  | 4.45868200  | 5.76594200  |
| H     | 4.09772200  | 5.22090400  | 5.48016700  |
| H     | 5.43453500  | 6.17618400  | 6.17326800  |
| O     | 5.62809600  | 5.83859900  | 4.19704100  |
| C     | -7.01546200 | 7.74872800  | -0.75853400 |
| H     | -6.54887700 | 7.84073000  | 0.23066700  |
| H     | -7.94864400 | 7.17890900  | -0.66180800 |
| H     | -7.24196300 | 8.74480500  | -1.14151300 |
| O     | -6.13502700 | 7.15733700  | -1.70059000 |
| C     | 3.41516000  | 0.95825300  | -1.08959800 |
| N     | 4.66518200  | 0.33619300  | -0.86869400 |
| H     | -3.36227900 | -0.59602300 | -0.21764900 |
| H     | -2.94866600 | -0.06114700 | -2.77730400 |
| H     | 4.24551200  | -2.05830500 | -2.29647600 |
| H     | 5.42486800  | 3.27480000  | -1.33449700 |

## References

- (1) A. D. Becke , A new mixing of Hartree-Fock and Local Density Functional Theories, *J. Chem. Phys.*, 1993, **98**, 1372-1377.
- (2) M. J. Frisch, G. W. Trucks, H. B. Schlegel, G. E. Scuseria, M. A. Robb, J. R. Cheeseman, Scalmani, V. Barone, B. Mennucci, G. A. Petersson, et al. Gaussian 09 C.01; Gaussian Inc.: *Wallingford CT*, 2009.
- (3) O. Treutler and R. Ahlrichs , Efficient Molecular Numerical Integration Schemes *J. Chem. Phys.*, 1995 , **102**, 346 –354.
- (4) W. J. Hehre, Ab Initio Molecular Orbital Theory , *Acc. Chem. Res.*, 1976 , **9**, 399–406.
- (5) R. Bauernschmitt and R. Ahlrichs, Treatment of Electronic Excitations within the Adiabatic Approximation of Time Dependent Density Functional Theory *Chem. Phys. Lett.*, 1996, **256**, 454 – 464.
- (6) F. Furche and D. Rappoport, *Computational Photochemistry*, Olivucci, M., Ed.; Elsevier: Amsterdam, 2005.
- (7) Y. Gabe, T. Ueno, Y. Urano, H. Kojima and T. Nagano, Tunable Design Strategy for Fluorescence Probes Based on 4-Substituted BODIPY Chromophore: Improvement of Highly Sensitive Fluorescence Probe for Nitric Oxide *Anal. Bioanal. Chem.* 2006, **386**, 621– 626.
- (8) F. Furche and R. Ahlrichs, Adiabatic Time-Dependent Density Functional Methods for Excited State Properties, *J. Chem. Phys.*, 2002 , **117**, 7433 –7447.
- (9) J. Leszczynski, M. Shukla, and Eds., *Practical Aspects of Computational Chemistry: Methods, Concepts and Applications*, Springer: 2009(doi: 10.1007/978-90-481-2687-3).

- (10) G. Scalmani, M. J. Frisch, B. Mennucci, J. Tomasi, R. Cammi and V. Barone, Geometries and Properties of Excited States in the Gas Phase and in Solution: Theory and Application of a Time-Dependent Density Functional Theory Polarizable Continuum Model, *J. Chem. Phys.*, 2006, **124**, 94107-94115.
